# Supplementary material
Source: HighWire-hosted journal article supplement (doi:10.1101/rna.079318.122)
Supplement: Supplemental_Table_S1.xlsx [file Supplemental_Table_S1.xlsx]

## Sheet: Sheet 1
Supplementary Table S1. Change in FP values obtained with eIF4A1 or eIF4A3 and FAM-labelled polyr(AG)8
Barcode	Subclass	SMILES	Chirality Class	Delta mP eIFA1 rep1	Delta mP eIFA1 rep2	Delta mP eIFA3 rep1	Delta mP eIF4A3 rep2	Delta mP eIF4A1 mean	Delta mP eIF4A1 stdev	Delta mP eIF4A3 mean	Delta mP eIF4A3 stdev
CMLD012050	Rocaglaol	COC1=CC=C(C=C1)[C@@]12OC3=CC(OC)=CC(OC)=C3[C@]1(O)C(=O)C[C@H]2C1=CC=CC=C1	Racemic	44.3	50.2	34	31.1	47.3	4.2	32.6	2.1
CMLD012373	Rocaglate pyrimidinone (RP)	COC1=CC=C(C=C1)[C@@]12OC3=CC(OC)=CC(OC)=C3[C@]1(O)C1=C([C@H]2C2=CC=CC=C2)C(=O)NC(=N1)C1CCCCC1	Racemic	44.8	39.6	25.7	35	42.2	3.7	30.4	6.6
CMLD012040	Rocaglate pyrimidinone (RP)	COC1=CC=C(C=C1)[C@@]12OC3=CC(OC)=CC(OC)=C3[C@]1(O)C1=C([C@H]2C2=CC=CC=C2)C(=O)NC(=N1)N1CCOCC1	Racemic	54.1	45	30.5	33.7	49.6	6.4	32.1	2.3
CMLD010853	Standard rocaglate	COC(=O)[C@H]1[C@@H](O)[C@@]2(O)C3=C(OC)C=C(OC)C=C3O[C@]2([C@@H]1C1=CC=CC=C1)C1=CC=C(OC)C=C1	Absolute	79.6	62.2	43.3	50	70.9	12.3	46.7	4.7
CMLD010513	Standard rocaglate	CONC(=O)[C@H]1[C@@H](O)[C@@]2(O)C3=C(OC)C=C(OC)C=C3O[C@]2([C@@H]1C1=CC=CC=C1)C1=CC=C(OC)C=C1	Absolute	68.3	74.6	66.5	44.5	71.5	4.5	55.5	15.6
CMLD012824	Amidino rocaglate (ADR)	CON(C)C(=O)[C@@H]1[C@@H](C2=CC=CC=C2)[C@@]2(OC3=CC(OC)=CC(OC)=C3[C@@]22NC(C)=N[C@@]12O)C1=CC=C(OC)C=C1	Absolute	119	114.5	96.6	80.1	116.8	3.2	88.4	11.7
CMLD011866	Rocaglate pyrimidinone (RP)	[H]O[C@@]12C3=C([C@@H](C4=CC=CC=C4)[C@@]1(OC1=CC(OC)=CC(OC)=C21)C1=CC=C(OC)C=C1)C(=O)N1CCCC1=N3	Absolute	62.5	78	41.5	36.2	70.3	11	38.9	3.7
CMLD013586	Rocaglaol	[H]O[C@@H]1C[C@@H](C2=CC=CC=C2)[C@@]2(OC3=CC(OC)=CC(OC)=C3[C@]12O[H])C1=CC=C(OC)C=C1	Racemic	76.6	66	48.8	41.2	71.3	7.5	45	5.4
CMLD013608	Amidino rocaglate (ADR)	COC(=O)[C@@H]1[C@@H](C2=CC=CC=C2)[C@@]2(OC3=CC(OC)=CC(OC)=C3[C@@]22NC(=N[C@@]12O)N1CCOCC1)C1=CC=C(OC)C=C1	Racemic	75.3	68.9	50.8	30.4	72.1	4.5	40.6	14.4
CMLD012390	Rocaglate pyrimidinone (RP)	COC1=CC=C(C=C1)[C@@]12OC3=CC(OC)=CC(OC)=C3[C@]1(O)C1=C([C@H]2C2=CC=CC=C2)C(=O)NC(C)=N1	Racemic	69.5	63.4	38.5	51.7	66.5	4.3	45.1	9.3
CR-1-31B	Standard rocaglate	CONC(=O)[C@H]1[C@@H](O)[C@@]2(O)C3=C(OC)C=C(OC)C=C3O[C@]2([C@@H]1C1=CC=CC=C1)C1=CC=C(OC)C=C1	Absolute	67.9	63.9	54.4	51.8	65.9	2.8	53.1	1.8
RocA	Standard rocaglate	COC1=CC=C(C=C1)[C@@]12OC3=C(C(OC)=CC(OC)=C3)[C@]1(O)[C@H](O)[C@@H]([C@H]2C1=CC=CC=C1)C(=O)N(C)C	Absolute	68.9	48	53	23	58.5	14.8	38	21.2
CMLD011893	Standard rocaglate	COC1=CC=C(C=C1)[C@@]12OC3=CC(OC)=CC(OC)=C3[C@]1(O)[C@@H]1OC(=O)[C@@H]1[C@H]2C1=CC=CC=C1	Racemic	55.9	43.3	25.9	25.1	49.6	8.9	25.5	0.6
CMLD012365	Rocaglate pyrimidinone (RP)	COC1=CC=C(C=C1)[C@@]12OC3=CC(OC)=CC(OC)=C3[C@]1(O)C1=C([C@H]2C2=CC=CC=C2)C(=O)NC(=N1)C1=CC=CC(OC)=C1	Absolute	49.8	31.5	28.4	26.8	40.7	12.9	27.6	1.1
CMLD012331	Rocaglate pyrimidinone (RP)	COC1=CC=C(C=C1)[C@@]12OC3=CC(OC)=CC(OC)=C3[C@]1(O)C1=C([C@H]2C2=CC=CC=C2)C(=O)NC(=N1)C1=CN=CC=N1	Racemic	38.5	36.9	22	22.3	37.7	1.1	22.2	0.2
CMLD013342	Rocaglate pyrimidinone (RP)	COC1=CC=C(C=C1)[C@@]12OC3=CC(OC)=CC(OC)=C3[C@]1(O)C1=C([C@H]2C2=CC=CC=C2)C(=O)NC(=N1)C1CC1	Absolute	42	54.6	31.6	27.8	48.3	8.9	29.7	2.7
CMLD011157	Aglain	[H]OC1[C@@]2(O[H])[C@H]([C@H](C3=CC=CC=C3)[C@@]1(OC1=C2C(OC)=CC(OC)=C1)C1=CC=C(OC)C=C1)C(=O)OC	Racemic	3.2	0.1	1.7	-5.4	1.7	2.2	-1.9	5
CMLD012677	Aglain	COC(=O)[C@@H]1[C@@H](C2=CC=CC=C2)[C@@]2(N(C)C3=C(C=CC=C3)[C@@]1(O)C2=O)C1=CC=C(OC)C=C1	Absolute	-1.7	-2.2	-0.8	-13.4	-2	0.4	-7.1	8.9
CMLD012149	Amidino rocaglate (ADR)	COC(=O)[C@@H]1[C@@H](C2=CC=CC=C2)[C@@]2(OC3=CC(OC)=CC(OC)=C3[C@@]22OC(=N[C@@]12O)C1=CN=C(Cl)C=C1)C1=CC=C(OC)C=C1	Racemic	20.4	6.1	9	9.7	13.3	10.1	9.4	0.5
CMLD012666	Aglain	COC(=O)[C@@H]1[C@@H](C2=CC=CC=C2)C2(N(C)C3=CC=CC=C3C1(O)C2=O)C1=CC=C(OC)C=C1	Racemic	-0.7	-0.3	-2.6	-10.1	-0.5	0.3	-6.4	5.3
CMLD013211	Rocaglate pyrimidinone (RP)	COC(=O)\C=C\CN1C(=O)C2=C(N=C1C1=CC=CC=C1)[C@@]1(O)C3=C(OC)C=C(OC)C=C3O[C@]1([C@@H]2C1=CC=CC=C1)C1=CC=C(OC)C=C1	Racemic	13.3	9.1	4.9	3.7	11.2	3	4.3	0.8
CMLD012173	Rocaglate ketone	COC1=CC=C(C=C1)[C@@]12OC3=CC(OC)=CC(OC)=C3[C@]1(O)[C@H](O)[C@@H]([C@H]2C1=CC=CC=C1)C(=O)C1=CC2=C(O1)C=CC=C2	Racemic	22.1	6	11.2	5.1	14.1	11.4	8.2	4.3
CMLD010582	Rocaglate pyrimidinone (RP)	COC1=CC=C(C=C1)[C@@]12OC3=CC(OC)=CC(OC)=C3[C@]1(O)C1=C([C@H]2C2=CC=CC=C2)C(=O)N2CCC[C@@]2(C)N1	Racemic	-8.1	6.8	5.3	5	-0.7	10.5	5.2	0.2
CMLD012409	Rocaglate pyrimidinone (RP)	COC1=CC=C(C=C1)[C@@]12OC3=CC(OC)=CC(OC)=C3[C@]1(O)C1=C([C@H]2C2=CC=CC=C2)C(=O)NC(=N1)C1=CC=C(C=C1)C(F)(F)F	Absolute	10.4	12.9	13.6	9.2	11.7	1.8	11.4	3.1
CMLD012608	Rocaglate pyrimidinone (RP)	COC1=CC=C(C=C1)[C@@]12OC3=CC(OC)=CC(OC)=C3[C@]1(O)C1=C([C@H]2C2=CC=CC=C2)C(=O)NC(=N1)C1=CC=C(O)C=C1	Racemic	17.4	23.2	13	5.9	20.3	4.1	9.5	5
CMLD011849	Rocaglate pyrimidinone (RP)	COC1=CC=C(C=C1)[C@@]12OC3=CC(OC)=CC(OC)=C3[C@]1(O)C1=C([C@H]2C2=CC=CC=C2)C(=O)NC(=N1)C1=CC=CC=C1	Racemic	11	17.3	6.8	2.5	14.2	4.5	4.7	3
CMLD005522	Standard rocaglate	CONC(=O)[C@H]1[C@@H](O)[C@@]2(O)C3=C(OC)C=C(OC)C=C3O[C@]2([C@@H]1C1=CC=CC=C1)C1=CC=C(OC)C=C1	Racemic	19.4	22.2	21.3	35.3	20.8	2	28.3	9.9
CMLD012677	Aglain	COC(=O)[C@@H]1[C@@H](C2=CC=CC=C2)[C@@]2(N(C)C3=C(C=CC=C3)[C@@]1(O)C2=O)C1=CC=C(OC)C=C1	Absolute	0.7	9.5	0.8	3.1	5.1	6.2	2	1.6
CMLD011892	Standard rocaglate	COC(=O)[C@H]1[C@@H](O)[C@@]2(O)C3=C(OC)C=C(O)C=C3O[C@]2([C@@H]1C1=CC=CC=C1)C1=CC=C(OC)C=C1	Racemic	54.6	53	38	44.3	53.8	1.1	41.2	4.5
BUCMD00209	Rocaglate pyrimidinone (RP)	COC1=CC(OC)=C2C(O[C@]3([C@@H](C4=C(N[C@@H]5CCCN5C4=O)[C@@]23O)C2=CC=CC=C2)C2=CC=C(Br)C=C2)=C1	Racemic	50.1	44.5	46.4	29.2	47.3	4	37.8	12.2
CMLD010332	Standard rocaglate	COC1=CC=C(C=C1)[C@@]12OC3=CC(OC)=CC(OC)=C3[C@]1(O)[C@H](O)[C@H](CO)[C@H]2C1=CC=CC=C1	Racemic	55.8	51.2	46.8	32.3	53.5	3.3	39.6	10.3
CMLD012042	Rocaglate pyrimidinone (RP)	COC1=CC=C(C=C1)[C@@]12OC3=CC(OC)=CC(OC)=C3[C@]1(O)C1=C([C@H]2C2=CC=CC=C2)C(=O)NC(=N1)C1=CN=CC=C1	Racemic	49.2	42.4	32.7	29.6	45.8	4.8	31.2	2.2
CMLD009433	Standard rocaglate	COC1=CC=C(C=C1)[C@@]12OC3=CC(OC)=CC(OC)=C3[C@]1(O)C1=C([C@H]2C2=CC=CC=C2)C(O)=NN1	Racemic	40.7	33.4	36.8	24.7	37.1	5.2	30.8	8.6
CMLD012412	Amidino rocaglate (ADR)	COCC1=N[C@@]2(O)[C@@H]([C@@H](C3=CC=CC=C3)[C@@]3(OC4=CC(OC)=CC(OC)=C4[C@]23N1)C1=CC=C(OC)C=C1)C(=O)OC	Racemic	52.2	58.7	41.6	21.2	55.5	4.6	31.4	14.4
CMLD012028	Rocaglaol	CNCCOC1=CC=C2C(O[C@]3([C@@H](C[C@H](O)[C@@]23O)C2=CC=CC=C2)C2=CC=C(Cl)C=C2)=C1	Absolute	124.2	113.5	110.3	107.6	118.9	7.6	109	1.9
CMLD010511	Standard rocaglate	COC(=O)[C@H]1[C@@H](O)[C@@]2(O)C3=C(OC)C=C(OC)C=C3O[C@]2([C@@H]1C1=CC=CC=C1)C1=CC=C(Br)C=C1	Racemic	30	47	39.2	29.4	38.5	12	34.3	6.9
CMLD012623	Standard rocaglate	CONC(=O)[C@H]1[C@@H](O)[C@@]2(O)C3=C(OC)C=C(OC)C=C3O[C@]2([C@@H]1C1=CC=CC=C1)C1=CC=C(Br)C=C1	Absolute	78.1	70.8	60.1	50.9	74.5	5.2	55.5	6.5
CMLD012029	Rocaglaol	O[C@H]1C[C@@H](C2=CC=CC=C2)[C@@]2(OC3=CC(OCCN4CCCC4)=CC=C3[C@]12O)C1=CC=C(Cl)C=C1	Absolute	89.4	75.6	74.3	73.6	82.5	9.8	74	0.5
BUCMD00513	Amidino rocaglate (ADR)	[2H]C([2H])([2H])C1=N[C@@]2(O)[C@@H]([C@@H](C3=CC=CC=C3)[C@@]3(OC4=CC(OC)=CC(OC)=C4[C@]23N1)C1=CC=C(OC)C=C1)C(=O)OC	Racemic	75.7	68	40.2	31.9	71.9	5.4	36.1	5.9
CMLD011891	Standard rocaglate	COC(=O)[C@H]1[C@@H](O)[C@@]2(O)C3=C(OC)C=C(O)C=C3O[C@]2([C@@H]1C1=CC=CC=C1)C1=CC=C(Br)C=C1	Absolute	55	72.3	47.2	33	63.7	12.2	40.1	10
CMLD012611	Amidino rocaglate (ADR)	COC1=CC=C(C=C1)[C@@]12OC3=CC(OC)=CC(OC)=C3[C@@]11NC(C)=N[C@@]1(O)[C@@H]([C@H]2C1=CC=CC=C1)C(=O)N(C)C	Absolute	98.4	92.4	74.1	54.3	95.4	4.2	64.2	14
CMLD011890	Standard rocaglate	CON(C)C(=O)[C@H]1[C@@H](O)[C@@]2(O)C3=C(OC)C=C(O)C=C3O[C@]2([C@@H]1C1=CC=CC=C1)C1=CC=C(Br)C=C1	Absolute	84.1	87.3	64.5	51.1	85.7	2.3	57.8	9.5
CMLD010510	Standard rocaglate	CON(C)C(=O)[C@H]1[C@@H](O)[C@@]2(O)C3=C(OC)C=C(OC)C=C3O[C@]2([C@@H]1C1=CC=CC=C1)C1=CC=C(Br)C=C1	Racemic	63.2	72.9	60.9	43	68.1	6.9	52	12.7
CMLD010515	Standard rocaglate	CON(C)C(=O)[C@H]1[C@@H](O)[C@@]2(O)C3=C(OC)C=C(OC)C=C3O[C@]2([C@@H]1C1=CC=CC=C1)C1=CC=C(OC)C=C1	Absolute	98.4	90.8	84.1	68	94.6	5.4	76.1	11.4
CMLD010335	Standard rocaglate	CONC(=O)[C@H]1[C@@H](O)[C@@]2(O)C3=C(OC)C=C(F)C=C3O[C@]2([C@@H]1C1=CC=CC=C1)C1=CC=C(Br)C=C1	Racemic	81.9	80.4	64.7	60.3	81.2	1.1	62.5	3.1
CMLD010508	Standard rocaglate	CONC(=O)[C@H]1[C@@H](O)[C@@]2(O)C3=C(OC)C=C(OC)C=C3O[C@]2([C@@H]1C1=CC=CC=C1)C1=CC=C(Br)C=C1	Absolute	84.8	74.7	34	58.2	79.8	7.1	46.1	17.1
CMLD012073	Amidino rocaglate (ADR)	COC(=O)[C@@H]1[C@@H](C2=CC=CC=C2)[C@@]2(OC3=CC(OC)=CC(OC)=C3[C@@]22N=C(C)N[C@@]12O)C1=CC=C(OC)C=C1	Racemic	78	77	46.4	60	77.5	0.7	53.2	9.6
CMLD012361	Amidino rocaglate (ADR)	COC(=O)[C@@H]1[C@@H](C2=CC=CC=C2)[C@@]2(OC3=CC(OC)=CC(OC)=C3[C@@]22N=C(C)N[C@@]12O)C1=CC=C(OC)C=C1	Absolute	90.5	92.5	57.8	64.9	91.5	1.4	61.4	5
CMLD013607	Amidino rocaglate (ADR)	COC(=O)[C@@H]1[C@@H](C2=CC=CC=C2)[C@@]2(OC3=CC(OC)=CC(OC)=C3[C@@]22N3CCCCC3=N[C@@]12O)C1=CC=C(OC)C=C1	Racemic	83.4	82.4	54.6	38.1	82.9	0.7	45.2	10
CMLD011850	Rocaglate pyrimidinone (RP)	COC1=CC=C(C=C1)[C@@]12OC3=CC(OC)=CC(OC)=C3[C@]1(O)C1=C([C@@H]2C2=CC=CC=C2)C(=O)N2CCCC2=N1	Racemic	20.5	39.8	12.2	7.7	30.2	13.6	10	3.2
CMLD011888	Standard rocaglate	COC1=CC=C(C=C1)[C@@]12OC3=CC(OC)=CC(OC)=C3[C@]1(O)C(=O)[C@@H]([C@H]2C1=CC=CC=C1)C(=O)NCCCC1(C)OCCO1	Absolute	51.3	62.8	30	29.8	57.1	8.1	29.9	0.1
CMLD012371	Rocaglate pyrimidinone (RP)	[H]O[C@@]12C3=C([C@@H](C4=CC=CC=C4)[C@@]1(OC1=CC(OC)=CC(OC)=C21)C1=CC=C(OC)C=C1)C(=O)N1CCCC1=N3	Racemic	65.2	56.6	44.5	47.5	60.9	6.1	46	2.1
CMLD010512	Standard rocaglate	[H]O[C@@H]1[C@@H]([C@@H](C2=CC=CC=C2)[C@@]2(OC3=CC(OC)=CC(OC)=C3[C@]12O[H])C1=CC=C(OC)C=C1)C(=O)N([H])CCCC(OC)OC	Racemic	55	67.9	40.1	46.8	61.5	9.1	43.5	4.7
CMLD012562	Amidino rocaglate (ADR)	CCCC1=N[C@@]2(O)[C@@H]([C@@H](C3=CC=CC=C3)[C@@]3(OC4=CC(OC)=CC(OC)=C4[C@]23N1)C1=CC=C(OC)C=C1)C(=O)OC	Racemic	68.6	63.4	40.5	31.5	66	3.7	36	6.4
CMLD012567	Amidino rocaglate (ADR)	CCCCC1=N[C@@]2(O)[C@@H]([C@@H](C3=CC=CC=C3)[C@@]3(OC4=CC(OC)=CC(OC)=C4[C@]23N1)C1=CC=C(OC)C=C1)C(=O)OC	Racemic	67	67.9	38.4	38.8	67.5	0.6	38.6	0.3
CMLD012372	Rocaglate pyrimidinone (RP)	CCOC1=C(C=CC=C1)C1=NC2=C([C@@H](C3=CC=CC=C3)[C@@]3(OC4=CC(OC)=CC(OC)=C4[C@]23O)C2=CC=C(OC)C=C2)C(=O)N1	Racemic	66.8	57.2	37.3	42.7	62	6.8	40	3.8
CMLD012072	Amidino rocaglate (ADR)	COC(=O)[C@@H]1[C@@H](C2=CC=CC=C2)[C@@]2(OC3=CC(OC)=CC(OC)=C3[C@@]22N=C(N[C@@]12O)C1CC1)C1=CC=C(OC)C=C1	Racemic	59.5	62.7	33	27	61.1	2.3	30	4.2
CMLD012362	Amidino rocaglate (ADR)	COC(=O)[C@@H]1[C@@H](C2=CC=CC=C2)[C@@]2(OC3=CC(OC)=CC(OC)=C3[C@@]22N=C(N[C@@]12O)C1CC1)C1=CC=C(OC)C=C1	Absolute	85.2	86.1	60.1	70.8	85.7	0.6	65.5	7.6
CMLD012561	Amidino rocaglate (ADR)	COC(=O)[C@@H]1[C@@H](C2=CC=CC=C2)[C@@]2(OC3=CC(OC)=CC(OC)=C3[C@@]22NC(=N[C@@]12O)C1CCCCC1)C1=CC=C(OC)C=C1	Racemic	52.7	63.4	37.3	43.2	58.1	7.6	40.3	4.2
CMLD011352	Standard rocaglate	COC1=CC(F)=CC2=C1[C@]1(O)[C@H](O)[C@@H]([C@@H](C3=CC=CC=C3)[C@@]1(O2)C1=CC=C(Br)C=C1)C(\N)=N\O	Racemic	59.6	60.6	44.5	37.7	60.1	0.7	41.1	4.8
CMLD013340	Standard rocaglate	COC1=CC(OC)=C2C(O[C@]3([C@@H]([C@@H](CN(C)C)[C@@H](O)[C@@]23O)C2=CC=CC=C2)C2=CC=C(C=C2)C#N)=C1	Racemic	76.9	88.5	46.5	46.4	82.7	8.2	46.5	0.1
CMLD013585	Standard rocaglate	COC1=CC(OC)=C2C(O[C@]3([C@@H]([C@H]([C@@H](O)[C@@]23O)C(=O)N(C)C)C2=CC=CC=C2)C2=CC=C(Br)C=C2)=C1	Racemic	84.4	87.4	46.2	36.1	85.9	2.1	41.2	7.1
BUCMD00211	Rocaglate pyrimidinone (RP)	COC1=CC(OC)=C2C(O[C@]3([C@@H](C4=C(O[C@@H]5CCCN5C4=O)[C@@]23O)C2=CC=CC=C2)C2=CC=C(Br)C=C2)=C1	Racemic	54.6	62.4	34.7	51.6	58.5	5.5	43.2	12
CMLD011886	Standard rocaglate	COC1=CC=C(C=C1)[C@@]12OC3=CC(OC)=CC(OC)=C3[C@]1(O)[C@H](O)[C@@H]([C@H]2C1=CC=CC=C1)C(O)=O	Absolute	52.7	65.8	54	34.9	59.3	9.3	44.5	13.5
CMLD013210	Standard rocaglate	COC1=CC=C(C=C1)[C@@]12OC3=CC(OC)=CC(OC)=C3[C@]1(O)[C@H](O)[C@H](CN(C)C)[C@H]2C1=CC=CC=C1	Racemic	70.6	70.7	49.9	40.7	70.7	0.1	45.3	6.5
CMLD011840	Rocaglate pyrimidinone (RP)	COC1=CC=C(C=C1)[C@@]12OC3=CC(OC)=CC(OC)=C3[C@]1(O)C1=C([C@H]2C2=CC=CC=C2)C(=O)NC(=N1)C1CC1	Racemic	62.4	59	42.5	34.8	60.7	2.4	38.7	5.4
CMLD013250	Rocaglate pyrimidinone (RP)	COC1=CC=C(C=C1)[C@@]12OC3=CC(OC)=CC(OC)=C3[C@]1(O)C1=C([C@H]2C2=CC=CC=C2)C(=O)NC(=N1)C1CC1	Absolute	57.2	76.1	44.7	25.2	66.7	13.4	35	13.8
CMLD013348	Rocaglate pyrimidinone (RP)	COC1=CC=C(C=C1)[C@@]12OC3=CC(OC)=CC(OC)=C3[C@]1(O)C1=C([C@H]2C2=CC=CC=C2)C(=O)NC(=N1)N1CCOCC1	Absolute	62.5	54.1	44.9	33	58.3	5.9	39	8.4
CMLD012823	Amidino rocaglate (ADR)	COCC1=N[C@@]2(O)[C@@H]([C@@H](C3=CC=CC=C3)[C@@]3(OC4=CC(OC)=CC(OC)=C4[C@]23N1)C1=CC=C(OC)C=C1)C(=O)OC	Absolute	73.6	71.7	52.4	33.2	72.7	1.3	42.8	13.6
CMLD012982	Rocaglate pyrimidinone (RP)	COCC1=NC2=C([C@@H](C3=CC=CC=C3)[C@@]3(OC4=CC(OC)=CC(OC)=C4[C@]23O)C2=CC=C(OC)C=C2)C(=O)N1	Racemic	55.6	69.6	30	35.1	62.6	9.9	32.6	3.6
CMLD013334	Amidino rocaglate (ADR)	CON(C)C(=O)[C@@H]1[C@@H](C2=CC=CC=C2)[C@@]2(OC3=CC(OC)=CC(OC)=C3[C@@]22NC(=N[C@@]12O)C1CC1)C1=CC=C(OC)C=C1	Absolute	77.9	80.3	59.2	39.9	79.1	1.7	49.6	13.6
BUCMD00003	Standard rocaglate	CONC(=O)[C@H]1[C@@H](O)[C@@]2(O)C3=C(OC)C=C(O)C=C3O[C@]2([C@@H]1C1=CC=CC=C1)C1=CC=C(Br)C=C1	Racemic	61.1	73.8	51.8	57.6	67.5	9	54.7	4.1
CMLD013626	Rocaglate pyrimidinone (RP)	[H][C@@]12CCCN1C(=O)C1=C(O2)[C@@]2(O)C3=C(OC)C=C(OC)C=C3O[C@]2([C@@H]1C1=CC=CC=C1)C1=CC=C(OC)C=C1	Absolute	60.4	42.7	51.9	18.5	51.6	12.5	35.2	23.6
CMLD012607	Amidino rocaglate (ADR)	[H]C(=O)C1=C2N=C(C)N[C@@]22C3=C(OC)C=C(OC)C=C3O[C@]2([C@@H]1C1=CC=CC=C1)C1=CC=C(OC)C=C1	Racemic	41.8	47.4	25.1	20.8	44.6	4	23	3
BUCMD00299	Amidino rocaglate (ADR)	COC(=O)[C@@H]1[C@@H](C2=CC=CC=C2)[C@@]2(OC3=CC(OC)=CC(OC)=C3[C@@]22N=C3CCCCN3[C@@]12O)C1=CC=C(OC)C=C1	Racemic	54.7	50.7	19.2	25.4	52.7	2.8	22.3	4.4
CMLD012564	Amidino rocaglate (ADR)	COC(=O)[C@@H]1[C@@H](C2=CC=CC=C2)[C@@]2(OC3=CC(OC)=CC(OC)=C3[C@@]22NC(=N[C@@]12O)C(C)(C)C)C1=CC=C(OC)C=C1	Racemic	62.6	64.5	32.6	24.9	63.6	1.3	28.8	5.4
CMLD012600	Amidino rocaglate (ADR)	COC(=O)[C@@H]1[C@@H](C2=CC=CC=C2)[C@@]2(OC3=CC(OC)=CC(OC)=C3[C@@]22NC(=N[C@@]12O)C(C)C)C1=CC=C(OC)C=C1	Racemic	67.2	72.9	39.5	19.7	70.1	4	29.6	14
CMLD012606	Amidino rocaglate (ADR)	COC(=O)[C@@H]1[C@@H](C2=CC=CC=C2)[C@@]2(OC3=CC(OC)=CC(OC)=C3[C@@]22NC(=N[C@@]12O)C1=CC=C(C=C1)N(C)C)C1=CC=C(OC)C=C1	Racemic	42.9	46.2	27.6	16.2	44.6	2.3	21.9	8.1
CMLD012151	Amidino rocaglate (ADR)	COC(=O)[C@@H]1[C@@H](C2=CC=CC=C2)[C@@]2(OC3=CC(OC)=CC(OC)=C3[C@@]22NC(=N[C@@]12O)C1=CC=C(OC)C=C1)C1=CC=C(OC)C=C1	Racemic	34.3	43.6	7.2	9.6	39	6.6	8.4	1.7
CMLD012152	Amidino rocaglate (ADR)	COC(=O)[C@@H]1[C@@H](C2=CC=CC=C2)[C@@]2(OC3=CC(OC)=CC(OC)=C3[C@@]22NC(=N[C@@]12O)C1=CN=CC=C1)C1=CC=C(OC)C=C1	Racemic	35.7	33.4	28	26.8	34.6	1.6	27.4	0.8
CMLD012150	Amidino rocaglate (ADR)	COC(=O)[C@@H]1[C@@H](C2=CC=CC=C2)[C@@]2(OC3=CC(OC)=CC(OC)=C3[C@@]22NC(=N[C@@]12O)C1=CSC(C)=N1)C1=CC=C(OC)C=C1	Racemic	49.1	27.4	26.3	20.8	38.3	15.3	23.6	3.9
CMLD012565	Amidino rocaglate (ADR)	COC(=O)[C@@H]1[C@@H](C2=CC=CC=C2)[C@@]2(OC3=CC(OC)=CC(OC)=C3[C@@]22NC(=N[C@@]12O)C1CCC1)C1=CC=C(OC)C=C1	Racemic	59	72.1	31.6	24.9	65.6	9.3	28.3	4.7
CMLD012411	Amidino rocaglate (ADR)	COC(=O)[C@@H]1[C@@H](C2=CC=CC=C2)[C@@]2(OC3=CC(OC)=CC(OC)=C3[C@@]22NC(=N[C@@]12O)C1CCN(CC1)C(=O)OC(C)(C)C)C1=CC=C(OC)C=C1	Racemic	36.8	41.2	16.6	13.6	39	3.1	15.1	2.1
CMLD012413	Amidino rocaglate (ADR)	COC(=O)[C@@H]1[C@@H](C2=CC=CC=C2)[C@@]2(OC3=CC(OC)=CC(OC)=C3[C@@]22NC(CC3=CC=CC=C3)=N[C@@]12O)C1=CC=C(OC)C=C1	Racemic	34.6	43.3	16.5	13.6	39	6.2	15.1	2.1
CMLD012822	Amidino rocaglate (ADR)	COC(=O)[C@@H]1[C@@H](C2=CC=CC=C2)[C@@]2(OC3=CC(OC)=CC(OC)=C3[C@@]22NC(CC3=CC=CC=C3)=N[C@@]12O)C1=CC=C(OC)C=C1	Absolute	67.9	65.4	30.9	23.4	66.7	1.8	27.2	5.3
CMLD012103	Amidino rocaglate (ADR)	COC(=O)[C@@H]1[C@@H](C2=CC=CC=C2)[C@@]2(OC3=CC(OC)=CC(OC)=C3[C@@]22OC(C)=N[C@@]12O)C1=CC=C(OC)C=C1	Racemic	48.9	30.2	31.9	26.1	39.6	13.2	29	4.1
CMLD013332	Standard rocaglate	COC(=O)[C@@H]1[C@@H](C2=CC=CC=C2)[C@@]2(OC3=CC(OC)=CC(OC)=C3[C@]2(O)C1=O)C1=CC=C(OC)C=C1	Absolute	41.8	52.4	30.8	25.6	47.1	7.5	28.2	3.7
CMLD010852	Standard rocaglate	COC(=O)[C@H]1[C@@H](O)[C@@]2(O)C3=C(OC)C=C(OC)C=C3O[C@]2([C@@H]1C1=CC=CC=C1)C1=CC=C(OC)C=C1	Racemic	29.6	32	20.7	24.2	30.8	1.7	22.5	2.5
CMLD011883	Standard rocaglate	COC(=O)[C@H]1[C@@H](O)[C@@]2(O)C3=C(OC)C=C(OS(=O)(=O)C4=CC=C(C)C=C4)C=C3O[C@]2([C@@H]1C1=CC=CC=C1)C1=CC=C(Br)C=C1	Absolute	48.5	33.2	14.6	9.2	40.9	10.8	11.9	3.8
CMLD012045	Rocaglate pyrimidinone (RP)	COC(=O)CC1=NC2=C([C@@H](C3=CC=CC=C3)[C@@]3(OC4=CC(OC)=CC(OC)=C4[C@]23O)C2=CC=C(OC)C=C2)C(=O)N1	Racemic	38.2	32.6	22.4	19.3	35.4	4	20.9	2.2
CMLD010343	Standard rocaglate	COC1=C2C(O[C@]3([C@@H]([C@@H](C#N)[C@@H](O)[C@@]23O)C2=CC=CC=C2)C2=CC=C(Br)C=C2)=CC(F)=C1	Racemic	33.5	41	32.3	25.6	37.3	5.3	29	4.7
BUCMD00210	Rocaglate pyrimidinone (RP)	COC1=CC(OC)=C2C(O[C@]3([C@@H](C4=C(N[C@H]5CCCN5C4=O)[C@@]23O)C2=CC=CC=C2)C2=CC=C(Br)C=C2)=C1	Racemic	52.7	35.1	39.5	18.6	43.9	12.4	29.1	14.8
CMLD013346	Rocaglate pyrimidinone (RP)	COC1=CC=C(C=C1)[C@@]12OC3=CC(OC)=C(F)C(OC)=C3[C@]1(O)C1=C([C@H]2C2=CC=CC=C2)C(=O)N2CCCC2=N1	Racemic	44.1	41.1	32.1	12.8	42.6	2.1	22.5	13.6
CMLD012601	Amidino rocaglate (ADR)	COC1=CC=C(C=C1)[C@@]12OC3=CC(OC)=CC(OC)=C3[C@@]11NC(C)=N[C@@]1(O)[C@@H]([C@H]2C1=CC=CC=C1)C(C)=O	Racemic	59.9	61.4	30.4	25.5	60.7	1.1	28	3.5
CMLD010536	Rocaglate ketone	COC1=CC=C(C=C1)[C@@]12OC3=CC(OC)=CC(OC)=C3[C@]1(O)[C@H](O)[C@@H]([C@H]2C1=CC=CC=C1)C(=O)C1=CC=CO1	Absolute	31.1	46.3	28.7	17.2	38.7	10.7	23	8.1
CMLD012171	Rocaglate ketone	COC1=CC=C(C=C1)[C@@]12OC3=CC(OC)=CC(OC)=C3[C@]1(O)[C@H](O)[C@@H]([C@H]2C1=CC=CC=C1)C(=O)C1=NC=CN1C	Racemic	35.1	28.1	9.9	21.2	31.6	4.9	15.6	8
CMLD011885	Standard rocaglate	COC1=CC=C(C=C1)[C@@]12OC3=CC(OC)=CC(OC)=C3[C@]1(O)[C@H](O)[C@@H]([C@H]2C1=CC=CC=C1)C(O)=O	Racemic	42.8	59.4	20.7	16.2	51.1	11.7	18.5	3.2
CMLD012187	Rocaglate ketone	COC1=CC=C(C=C1)[C@@]12OC3=CC(OC)=CC(OC)=C3[C@]1(O)[C@H](O)[C@@H]([C@H]2C1=CC=CC=C1OC)C(=O)C1=CC=CO1	Racemic	33.5	32.5	23	24.2	33	0.7	23.6	0.8
CMLD011929	Rocaglate ketone	COC1=CC=C(C=C1)[C@@]12OC3=CC(OC)=CC(OC)=C3[C@]1(O)C=C([C@H]2C1=CC=CC=C1)C(=O)C1=CC=CO1	Racemic	42.1	23.9	22	27.8	33	12.9	24.9	4.1
CMLD012333	Rocaglate pyrimidinone (RP)	COC1=CC=C(C=C1)[C@@]12OC3=CC(OC)=CC(OC)=C3[C@]1(O)C1=C([C@H]2C2=CC=CC=C2)C(=O)N(C)C(=N1)C1=CC=CC=C1	Racemic	31.1	40.3	18	17.9	35.7	6.5	18	0.1
CMLD011839	Rocaglate pyrimidinone (RP)	COC1=CC=C(C=C1)[C@@]12OC3=CC(OC)=CC(OC)=C3[C@]1(O)C1=C([C@H]2C2=CC=CC=C2)C(=O)N2CCCCC2=N1	Racemic	50.8	51.1	28.4	22.3	51	0.2	25.4	4.3
CMLD011865	Rocaglate pyrimidinone (RP)	COC1=CC=C(C=C1)[C@@]12OC3=CC(OC)=CC(OC)=C3[C@]1(O)C1=C([C@H]2C2=CC=CC=C2)C(=O)NC(=N1)C(C)C	Racemic	29.1	41.1	14	21.2	35.1	8.5	17.6	5.1
CMLD012318	Rocaglate pyrimidinone (RP)	COC1=CC=C(C=C1)[C@@]12OC3=CC(OC)=CC(OC)=C3[C@]1(O)C1=C([C@H]2C2=CC=CC=C2)C(=O)NC(=N1)C1=C(Cl)C=CC=C1	Racemic	46.9	32.4	27	24.8	39.7	10.3	25.9	1.6
CMLD012363	Rocaglate pyrimidinone (RP)	COC1=CC=C(C=C1)[C@@]12OC3=CC(OC)=CC(OC)=C3[C@]1(O)C1=C([C@H]2C2=CC=CC=C2)C(=O)NC(=N1)C1=CC=C(C)C=C1	Absolute	35.1	28.8	19.7	20.7	32	4.5	20.2	0.7
CMLD012320	Rocaglate pyrimidinone (RP)	COC1=CC=C(C=C1)[C@@]12OC3=CC(OC)=CC(OC)=C3[C@]1(O)C1=C([C@H]2C2=CC=CC=C2)C(=O)NC(CC2=CC=CC=C2)=N1	Racemic	31.8	33.2	15.1	17.6	32.5	1	16.4	1.8
CMLD011831	Rocaglate pyrimidinone (RP)	COC1=CC=C(C=C1)[C@@]12OC3=CC(OC)=CC(OC)=C3[C@]1(O)C1=C([C@H]2C2=CC=CC=C2)C(=O)NC=N1	Racemic	39.6	45.3	16.7	9.1	42.5	4	12.9	5.4
CMLD012366	Rocaglate pyrimidinone (RP)	COC1=CC=C(C=C1)[C@]12OC3=CC(OC)=CC(OC)=C3[C@@]1(O)C1=C([C@@H]2C2=CC=CC=C2)C(=O)NC(=N1)C1=CC=C(C)C=C1	Absolute	38.4	29.5	22	21.5	34	6.3	21.8	0.4
CMLD012367	Rocaglate pyrimidinone (RP)	COC1=CC=C(C=C1)C1=NC2=C([C@H](C3=CC=CC=C3)[C@]3(OC4=CC(OC)=CC(OC)=C4[C@@]23O)C2=CC=C(OC)C=C2)C(=O)N1	Absolute	35.1	28.7	12.8	19	31.9	4.5	15.9	4.4
CMLD013333	Amidino rocaglate (ADR)	COCC1=N[C@@]2(O)[C@@H]([C@@H](C3=CC=CC=C3)[C@@]3(OC4=CC(OC)=CC(OC)=C4[C@]23N1)C1=CC=C(OC)C=C1)C(=O)N(C)OC	Absolute	47.6	65.1	30	26.4	56.4	12.4	28.2	2.5
CMLD011889	Standard rocaglate	CON(C)C(=O)[C@H]1[C@@H](O)[C@@]2(O)C3=C(OC)C=C(O)C=C3O[C@]2([C@@H]1C1=CC=CC=C1)C1=CC=C(Br)C=C1	Racemic	40.3	58.3	13.6	28	49.3	12.7	20.8	10.2
CMLD012410	Standard rocaglate	CON(C)C(=O)[C@H]1[C@@H](O)[C@@]2(O)C3=C(OC)C=C(OC)C=C3O[C@]2([C@@H]1C1=CC=CC=C1)C1=CC(O)=C(OC)C=C1	Racemic	53	69.5	28.5	26.1	61.3	11.7	27.3	1.7
BUCMD00287	Rocaglate ketone	COC1=CC(OC)=C2C(O[C@]3([C@@H]([C@H]([C@@H](O)[C@@]23O)C(=O)C2=CC=CO2)C2=CC=CC=C2)C2=CC(O)=C(OC)C=C2)=C1	Racemic	8.5	9.6	-6.6	3.1	9.1	0.8	-1.8	6.9
CMLD011646	Aglain	[H][C@@]1(C(=O)N(C)OC)[C@@]([H])(C2=CC=CC=C2)[C@@]2(OC3=CC(OC)=CC(OC)=C3[C@@]1(O)C2=O)C1=CC=C(OC)C=C1	Racemic	-0.2	13	8.8	-0.3	6.4	9.3	4.3	6.4
CMLD011504	Aglain	[H][C@@]1(C(=O)OC)[C@@]([H])(C2=CC=CC=C2)[C@@]2(N(C)C3=CC(OC)=CC(OC)=C3[C@@]1(O)C2=O)C1=CC=C(Br)C=C1	Racemic	-2	7.9	11	-5.1	3	7	3	11.4
CMLD011706	Aglain	[H][C@@]1(C2=CC=CC=C2)[C@@]([H])(C2=CC=CC=C2)[C@@]2(N(C)C3=CC(OC)=CC(OC)=C3[C@@]1(O)C2=O)C1=CC=C(Br)C=C1	Racemic	-0.5	3.7	6.8	-8.6	1.6	3	-0.9	10.9
CMLD011684	Aglain	[H][C@@]1(O)[C@@]2(O)[C@@H]([C@@H](C3=CC=CC=C3)[C@@]1(OC1=CC(OC)=CC(OC)=C21)C1=CC=C(OC)C=C1)C(=O)OC	Racemic	2.7	10.2	13.1	-3.1	6.5	5.3	5	11.5
CMLD012726	Aglain	[H][C@@]1(O)[C@@]2(O)[C@H]([C@@H](C3=CC=CC=C3)[C@@]1(NC1=CC(OC)=CC(OC)=C21)C1=CC=C(Br)C=C1)C(=O)OCC	Racemic	8.7	14.8	6.3	6.4	11.8	4.3	6.4	0.1
CMLD011847	Aglain	[H][C@@]1(O)[C@@]2(O)[C@H](C3=CC=CC=C3)[C@@]([H])(C(=O)NCCCCNC(=O)C3=CC=CC=C3)[C@@]1(OC1=CC(OC)=CC(OC)=C21)C1=CC=C(OC)C=C1	Racemic	-5.9	3.1	7.4	-4.8	-1.4	6.4	1.3	8.6
CMLD012672	Aglain	[H][C@@]1(O)C2(O)[C@H]([C@H](\C=C\C3=CC=CC=C3)[C@]1(OC1=CC=CC=C21)C1=CC=CC=C1)C1=CC=CC=C1	Racemic	3.9	9.6	10.1	8.2	6.8	4	9.2	1.3
CMLD012723	Aglain	[H]C1(O)[C@]2(O)[C@@H]([C@@H](C3=CC=CC=C3)[C@]1(OC1=CC(OC)=CC(OC)=C21)C1=CC=C(OC)C=C1)C1=C(F)C(F)=C(F)C(F)=C1F	Racemic	2.9	8.1	7	2.7	5.5	3.7	4.9	3
CMLD010493	Aglain	[H]O[C@@]1([H])[C@@]2(O[H])[C@@H]([C@@H](C3=CC=CC=C3)[C@@]1(OC1=C2C(OC)=CC(OC)=C1)C1=CC=C(OC)C=C1)C(=O)N([H])CCCC(OC)OC	Racemic	0.5	1.3	9.7	-9.7	0.9	0.6	0	13.7
CMLD010516	Standard rocaglate	[H]O[C@@H]1[C@@H]([C@@H](C2=CC=CC=C2)[C@@]2(OC3=CC(OCC4=CC=CC=C4)=CC(OC)=C3[C@]12O[H])C1=CC=C(OC)C=C1)C(=O)OC	Racemic	6.9	17.2	12.4	0.7	12.1	7.3	6.6	8.3
CMLD010517	Rocaglaol	[H]O[C@@H]1C[C@@H](C2=CC=CC=C2)[C@@]2(OC3=CC(OC)=CC(OC)=C3[C@]12O[H])C1=CC=C(Br)C=C1	Racemic	24.9	28.7	32.5	23.8	26.8	2.7	28.2	6.2
CMLD010519	Aglain	[H]O[C@]1([H])[C@@]2(O[H])[C@@H]([C@@H](C3=CC=CC=C3)[C@@]1(OC1=C2C(OC)=CC(OC)=C1)C1=CC=C(OC)C=C1)C(=O)NCCCC(OC)OC	Racemic	-3.7	6.5	7.8	-0.9	1.4	7.2	3.5	6.2
CMLD010520	Aglain	[H]O[C@]1([H])[C@@]2(O[H])[C@@H]([C@@H](C3=CC=CC=C3)[C@@]1(OC1=C2C=CC=C1)C1=CC=CC=C1)C(=O)OC	Racemic	1.7	7.4	5.3	-3.3	4.6	4	1	6.1
CMLD010522	Aglain	[H]O[C@]1([H])[C@]2(O[H])[C@H]([C@H](C3=CC=CC=C3)[C@]1(OC1=C2C(OC)=CC(OC)=C1)C1=CC=C(Br)C=C1)C(=O)OC	Absolute	7.7	10.6	7.1	-7.5	9.2	2.1	-0.2	10.3
CMLD010523	Aglain	[H]O[C@]1([H])[C@]2(O[H])[C@H]([C@H](C3=CC=CC=C3)[C@]1(OC1=C2C(OC)=CC(OC)=C1)C1=CC=C(OC)C=C1)C(=O)OC	Absolute	-1	-2.2	6.4	-5.4	-1.6	0.8	0.5	8.3
CMLD010524	Nonstandard rocaglate	[H]O[C@]1([H])[C@]2(OC3=CC(OC)=CC(OC)=C3[C@@]11O[C@]3([H])CCCN3C(=O)[C@@H]1[C@H]2C1=CC=CC=C1)C1=CC=C(OC)C=C1	Racemic	-3.7	-12.8	1.1	-7	-8.3	6.4	-3	5.7
CMLD010528	Standard rocaglate	[H]O[C@]12[C@H]3OC(=O)[C@H]3[C@H](C3=CC=CC=C3)[C@]1(OC1=CC=CC=C21)C1=CC=CC=C1	Racemic	3.6	10.7	11.8	-8.1	7.2	5	1.9	14.1
CMLD012170	Rocaglate ketone	CCCC1=CC=C(O1)C(=O)[C@H]1[C@@H](O)[C@@]2(O)C3=C(OC)C=C(OC)C=C3O[C@]2([C@@H]1C1=CC=CC=C1)C1=CC=C(OC)C=C1	Racemic	15.9	3.3	6.5	6.4	9.6	8.9	6.5	0.1
CMLD012305	C8b amino rocaglate	CCCCN[C@@]12C(=O)[C@@H]([C@@H](C3=CC=CC=C3)[C@@]1(OC1=CC(OC)=CC(OC)=C21)C1=CC=C(OC)C=C1)C(=O)OC	Racemic	20	11.3	6.6	14.4	15.7	6.2	10.5	5.5
CMLD012306	C8b amino rocaglate	CCCN(CCC)[C@@]12C(=O)[C@@H]([C@@H](C3=CC=CC=C3)[C@@]1(OC1=CC(OC)=CC(OC)=C21)C1=CC=C(OC)C=C1)C(=O)OC	Racemic	8.2	0.2	0.6	6.2	4.2	5.7	3.4	4
CMLD013591	C8b amino rocaglate	CCCN[C@@]12C(=O)[C@@H]([C@@H](C3=CC=CC=C3)[C@@]1(OC1=CC(OC)=CC(OC)=C21)C1=CC=C(OC)C=C1)C(=O)N(C)C	Racemic	0.1	-8.9	1	1.3	-4.4	6.4	1.2	0.2
CMLD011841	Standard rocaglate	CCOC(=O)[C@H]1[C@@H](O)[C@@]2(O)C3=C(OC)C=C(OC)C=C3O[C@]2([C@@H]1C1=CC=C(Br)C=C1)C1=CC=C(OC)C=C1	Racemic	-2.8	6	10.7	-4.3	1.6	6.2	3.2	10.6
CMLD013583	Rocaglate pyrimidinone (RP)	CCOC(=O)COC1=CC(OC)=C2C(O[C@]3([C@@H](C4=C(N=C(N=C4OCC#C)C4=CC=CC=C4)[C@@]23OCC(=O)OCC)C2=CC=CC=C2)C2=CC=C(OC)C=C2)=C1	Racemic	1.5	-13.2	1.7	11.7	-5.9	10.4	6.7	7.1
CMLD013582	Rocaglate pyrimidinone (RP)	CCOC(=O)COC1=CC(OC)=C2C(O[C@]3([C@@H](C4=C(N=C(NC4=O)C4=CC=CC=C4)[C@@]23OCC(=O)OCC)C2=CC=CC=C2)C2=CC=C(OC)C=C2)=C1	Racemic	1.1	-15.9	-4.3	2.2	-7.4	12	-1.1	4.6
CMLD012597	Rocaglate pyrimidinone (RP)	CCOC(=O)COC1=NC(=NC2=C1[C@@H](C1=CC=CC=C1)[C@@]1(OC3=CC(OC)=CC(OC)=C3[C@]21O)C1=CC=C(OC)C=C1)C1=CC=CC=C1	Racemic	5.5	11.9	1.1	8.2	8.7	4.5	4.7	5
CMLD012595	Rocaglate pyrimidinone (RP)	CCOC(=O)COC1=NC(=NC2=C1[C@@H](C1=CC=CC=C1)[C@@]1(OC3=CC(OC)=CC(OC)=C3[C@]21OCC(=O)OCC)C1=CC=C(OC)C=C1)C1=CC=CC=C1	Racemic	0.4	9.6	0.3	5.6	5	6.5	3	3.7
CMLD011685	Standard rocaglate	CCOCCOCCN(OC)C(=O)[C@H]1[C@@H](O)[C@@]2(O)C3=C(OC)C=C(OC)C=C3O[C@]2([C@@H]1C1=CC=CC=C1)C1=CC=C(OC)C=C1	Racemic	14.5	31.8	18.3	10.8	23.2	12.2	14.6	5.3
CMLD013594	C8b amino rocaglate	CN[C@@]12C(=O)[C@@H]([C@@H](C3=CC=CC=C3)[C@@]1(OC1=CC(OC)=CC(OC)=C21)C1=CC=C(OC)C=C1)C(=O)OC	Racemic	17.5	-3.7	11.2	4.1	6.9	15	7.7	5
CMLD012172	Rocaglate ketone	CO\N=C(\[C@H]1[C@@H](O)[C@@]2(O)C3=C(OC)C=C(OC)C=C3O[C@]2([C@@H]1C1=CC=CC=C1)C1=CC=C(OC)C=C1)C1=CC=CO1	Racemic	17.4	3.1	6.8	7.7	10.3	10.1	7.3	0.6
CMLD011615	Aglain	COC(=O)[C@@H]1[C@@H](C2=CC=CC=C2)[C@@]2(OC3=CC(OC)=CC(OC)=C3[C@@]1(O)C2(O)O)C1=CC=C(Br)C=C1	Racemic	1.3	8.2	10.6	-1.9	4.8	4.9	4.4	8.8
CMLD010858	Aglain	COC(=O)[C@@H]1[C@@H](C2=CC=CC=C2)[C@@]2(OC3=CC(OC)=CC(OC)=C3[C@@]1(O)C2(O)O)C1=CC=C(OC)C=C1	Racemic	1.5	2.7	5.9	-0.5	2.1	0.8	2.7	4.5
CMLD012075	Amidino rocaglate (ADR)	COC(=O)[C@@H]1[C@@H](C2=CC=CC=C2)[C@@]2(OC3=CC(OC)=CC(OC)=C3[C@@]22N=C(N[C@@]12O)C1=CC=CC=C1)C1=CC=C(OC)C=C1	Racemic	32.6	24.2	14.7	11.7	28.4	5.9	13.2	2.1
CMLD013606	Amidino rocaglate (ADR)	COC(=O)[C@@H]1[C@@H](C2=CC=CC=C2)[C@@]2(OC3=CC(OC)=CC(OC)=C3[C@@]22N3CCCC3=N[C@@]12O)C1=CC=C(OC)C=C1	Racemic	17.7	-3.1	9	9.4	7.3	14.7	9.2	0.3
CMLD012599	Amidino rocaglate (ADR)	COC(=O)[C@@H]1[C@@H](C2=CC=CC=C2)[C@@]2(OC3=CC(OC)=CC(OC)=C3[C@@]22NC(=N[C@@]12O)C(F)(F)F)C1=CC=C(OC)C=C1	Racemic	23.7	30.7	15.2	11.2	27.2	4.9	13.2	2.8
CMLD012563	Amidino rocaglate (ADR)	COC(=O)[C@@H]1[C@@H](C2=CC=CC=C2)[C@@]2(OC3=CC(OC)=CC(OC)=C3[C@@]22NC(=N[C@@]12O)C1=CC=C(Br)C=C1)C1=CC=C(OC)C=C1	Racemic	7.3	14	4.1	5.5	10.7	4.7	4.8	1
CMLD012566	Amidino rocaglate (ADR)	COC(=O)[C@@H]1[C@@H](C2=CC=CC=C2)[C@@]2(OC3=CC(OC)=CC(OC)=C3[C@@]22NC(=N[C@@]12O)C1=CC=C(C=C1)C(F)(F)F)C1=CC=C(OC)C=C1	Racemic	7.3	11.5	7.5	0.4	9.4	3	4	5
CMLD012560	Amidino rocaglate (ADR)	COC(=O)[C@@H]1[C@@H](C2=CC=CC=C2)[C@@]2(OC3=CC(OC)=CC(OC)=C3[C@@]22NC(CCl)=N[C@@]12O)C1=CC=C(OC)C=C1	Racemic	20.9	25.7	12.1	14.9	23.3	3.4	13.5	2
CMLD012321	Amidino rocaglate (ADR)	COC(=O)[C@@H]1[C@@H](C2=CC=CC=C2)[C@@]2(OC3=CC(OC)=CC(OC)=C3[C@@]22OC(=N[C@@]12O)C1=C(Cl)C=CC=C1)C1=CC=C(OC)C=C1	Racemic	0.5	-16.8	4.8	-1.7	-8.2	12.2	1.6	4.6
CMLD012327	Amidino rocaglate (ADR)	COC(=O)[C@@H]1[C@@H](C2=CC=CC=C2)[C@@]2(OC3=CC(OC)=CC(OC)=C3[C@@]22OC(=N[C@@]12O)C1=CC=C(C=C1)C(F)(F)F)C1=CC=C(OC)C=C1	Racemic	3.2	-1.6	-1.3	-2.1	0.8	3.4	-1.7	0.6
CMLD012148	Amidino rocaglate (ADR)	COC(=O)[C@@H]1[C@@H](C2=CC=CC=C2)[C@@]2(OC3=CC(OC)=CC(OC)=C3[C@@]22OC(=N[C@@]12O)C1=CC=C(Cl)C=C1)C1=CC=C(OC)C=C1	Racemic	4.6	-0.4	5	4.6	2.1	3.5	4.8	0.3
CMLD012105	Amidino rocaglate (ADR)	COC(=O)[C@@H]1[C@@H](C2=CC=CC=C2)[C@@]2(OC3=CC(OC)=CC(OC)=C3[C@@]22OC(=N[C@@]12O)C1=CC=C(F)C=C1)C1=CC=C(OC)C=C1	Racemic	27.2	18.4	14.3	21.5	22.8	6.2	17.9	5.1
CMLD012104	Amidino rocaglate (ADR)	COC(=O)[C@@H]1[C@@H](C2=CC=CC=C2)[C@@]2(OC3=CC(OC)=CC(OC)=C3[C@@]22OC(=N[C@@]12O)C1=CC=C(OC)C=C1)C1=CC=C(OC)C=C1	Racemic	6.1	-7.7	8	-0.7	-0.8	9.8	3.7	6.2
CMLD012326	Amidino rocaglate (ADR)	COC(=O)[C@@H]1[C@@H](C2=CC=CC=C2)[C@@]2(OC3=CC(OC)=CC(OC)=C3[C@@]22OC(=N[C@@]12O)C1=CC=C(OCC2=CC=CC=C2)C=C1)C1=CC=C(OC)C=C1	Racemic	6.8	-0.6	1.1	4.9	3.1	5.2	3	2.7
CMLD012360	Amidino rocaglate (ADR)	COC(=O)[C@@H]1[C@@H](C2=CC=CC=C2)[C@@]2(OC3=CC(OC)=CC(OC)=C3[C@@]22OC(=N[C@@]12O)C1=CC=CC(OC)=C1)C1=CC=C(OC)C=C1	Absolute	5.3	-0.1	-1.8	0.4	2.6	3.8	-0.7	1.6
CMLD012102	Amidino rocaglate (ADR)	COC(=O)[C@@H]1[C@@H](C2=CC=CC=C2)[C@@]2(OC3=CC(OC)=CC(OC)=C3[C@@]22OC(=N[C@@]12O)C1=CC=CC=C1)C1=CC=C(OC)C=C1	Racemic	4.7	-7.7	2.1	5.8	-1.5	8.8	4	2.6
CMLD012099	Amidino rocaglate (ADR)	COC(=O)[C@@H]1[C@@H](C2=CC=CC=C2)[C@@]2(OC3=CC(OC)=CC(OC)=C3[C@@]22OC(=N[C@@]12O)C1=CN=CC=C1)C1=CC=C(OC)C=C1	Racemic	10.7	-0.1	3.8	3.2	5.3	7.6	3.5	0.4
CMLD012328	Amidino rocaglate (ADR)	COC(=O)[C@@H]1[C@@H](C2=CC=CC=C2)[C@@]2(OC3=CC(OC)=CC(OC)=C3[C@@]22OC(CC3=CC=CC=C3)=N[C@@]12O)C1=CC=C(OC)C=C1	Racemic	22.8	12.3	5.6	8.8	17.6	7.4	7.2	2.3
CMLD013593	C8b amino rocaglate	COC(=O)[C@@H]1[C@@H](C2=CC=CC=C2)[C@@]2(OC3=CC(OC)=CC(OC)=C3[C@]2(NC(C)C)C1=O)C1=CC=C(OC)C=C1	Racemic	4.2	8.4	1.3	-0.2	6.3	3	0.6	1.1
CMLD012310	C8b amino rocaglate	COC(=O)[C@@H]1[C@@H](C2=CC=CC=C2)[C@@]2(OC3=CC(OC)=CC(OC)=C3[C@]2(NC2=CC=CC=C2)C1=O)C1=CC=C(OC)C=C1	Racemic	-3.3	-12.1	-0.6	2.3	-7.7	6.2	0.9	2.1
CMLD013595	C8b amino rocaglate	COC(=O)[C@@H]1[C@@H](C2=CC=CC=C2)[C@@]2(OC3=CC(OC)=CC(OC)=C3[C@]2(NC23C[C@H]4C[C@H](C[C@H](C4)C2)C3)C1=O)C1=CC=C(OC)C=C1	Racemic	0.1	0.6	3.6	-0.9	0.4	0.4	1.4	3.2
CMLD012304	C8b amino rocaglate	COC(=O)[C@@H]1[C@@H](C2=CC=CC=C2)[C@@]2(OC3=CC(OC)=CC(OC)=C3[C@]2(NCC#C)C1=O)C1=CC=C(OC)C=C1	Racemic	5.5	2.2	-1.9	5.6	3.9	2.3	1.9	5.3
CMLD013597	C8b amino rocaglate	COC(=O)[C@@H]1[C@@H](C2=CC=CC=C2)[C@@]2(OC3=CC(OC)=CC(OC)=C3[C@]2(NCC=C)C1=O)C1=CC=C(OC)C=C1	Racemic	2.7	-10.3	3.9	-0.4	-3.8	9.2	1.8	3
CMLD012307	C8b amino rocaglate	COC(=O)[C@@H]1[C@@H](C2=CC=CC=C2)[C@@]2(OC3=CC(OC)=CC(OC)=C3[C@]2(NCC2=CC=CC=C2)C1=O)C1=CC=C(OC)C=C1	Racemic	7	-3.3	-1	6.2	1.9	7.3	2.6	5.1
CMLD013598	C8b amino rocaglate	COC(=O)[C@@H]1[C@@H](C2=CC=CC=C2)[C@@]2(OC3=CC(OC)=CC(OC)=C3[C@]2(NCC2=CC=CN=C2)C1=O)C1=CC=C(OC)C=C1	Racemic	1.2	-9.1	0.2	3.2	-4	7.3	1.7	2.1
CMLD013599	C8b amino rocaglate	COC(=O)[C@@H]1[C@@H](C2=CC=CC=C2)[C@@]2(OC3=CC(OC)=CC(OC)=C3[C@]2(NCC2=NC=CN2C)C1=O)C1=CC=C(OC)C=C1	Racemic	5.3	-8.4	4.8	2	-1.6	9.7	3.4	2
CMLD013600	C8b amino rocaglate	COC(=O)[C@@H]1[C@@H](C2=CC=CC=C2)[C@@]2(OC3=CC(OC)=CC(OC)=C3[C@]2(NCC2CCNCC2)C1=O)C1=CC=C(OC)C=C1	Racemic	3.8	-8.2	3.9	7.3	-2.2	8.5	5.6	2.4
CMLD013601	C8b amino rocaglate	COC(=O)[C@@H]1[C@@H](C2=CC=CC=C2)[C@@]2(OC3=CC(OC)=CC(OC)=C3[C@]2(NCC2CCOCC2)C1=O)C1=CC=C(OC)C=C1	Racemic	1	-12.1	-4.6	-0.6	-5.6	9.3	-2.6	2.8
CMLD013602	C8b amino rocaglate	COC(=O)[C@@H]1[C@@H](C2=CC=CC=C2)[C@@]2(OC3=CC(OC)=CC(OC)=C3[C@]2(NCCC2=C(C)N=CS2)C1=O)C1=CC=C(OC)C=C1	Racemic	0.6	-12.1	1.5	5.6	-5.8	9	3.6	2.9
CMLD012308	C8b amino rocaglate	COC(=O)[C@@H]1[C@@H](C2=CC=CC=C2)[C@@]2(OC3=CC(OC)=CC(OC)=C3[C@]2(NCCN(C)C)C1=O)C1=CC=C(OC)C=C1	Racemic	10.5	-3.2	5.6	4.5	3.7	9.7	5.1	0.8
CMLD012311	C8b amino rocaglate	COC(=O)[C@@H]1[C@@H](C2=CC=CC=C2)[C@@]2(OC3=CC(OC)=CC(OC)=C3[C@]2(NCCN2CCOCC2)C1=O)C1=CC=C(OC)C=C1	Racemic	18.2	13.5	7.1	13.7	15.9	3.3	10.4	4.7
CMLD012309	C8b amino rocaglate	COC(=O)[C@@H]1[C@@H](C2=CC=CC=C2)[C@@]2(OC3=CC(OC)=CC(OC)=C3[C@]2(NN(C)C)C1=O)C1=CC=C(OC)C=C1	Racemic	4.8	2.3	4	6	3.6	1.8	5	1.4
CMLD013604	Standard rocaglate	COC(=O)[C@@H]1[C@@H](C2=CC=CC=C2)[C@@]2(OC3=CC(OC)=CC(OC)=C3[C@]2(OC)C1=O)C1=CC=C(OC)C=C1	Racemic	4.8	9.3	4.7	-0.5	7.1	3.2	2.1	3.7
CMLD008821	Aglain	COC(=O)[C@@H]1[C@@H](c2ccccc2)[C@@]2(Oc3cc(OC)cc(OC)c3[C@@]1(O)[C@@H]2O)c1ccc(OC)cc1	Racemic	-0.7	7.1	13.5	0.8	3.2	5.5	7.2	9
CMLD010498	Aglain	COC(=O)[C@@H]1[C@@H](c2ccccc2)[C@@]2(Oc3cc(OC)cc(OC)c3[C@@]1(O)[C@@H]2O)c1ccc(OC)cc1	Absolute	-0.3	7.6	7.3	-6.2	3.7	5.6	0.6	9.5
CMLD010499	Aglain	COC(=O)[C@@H]1[C@@H](c2ccccc2)[C@@]2(Oc3cc(OC)cc(OC)c3[C@@]1(O)[C@@H]2O)c1ccc(OC)cc1	Absolute	7.8	8.2	6.5	-5.6	8	0.3	0.5	8.6
CMLD011683	Aglain	COC(=O)[C@@H]1[C@@H](c2ccccc2)[C@@]2(Oc3cc(OC)cc(OC)c3[C@@]1(O)[C@@H]2O)c1ccc(OC)cc1	Racemic	-0.9	11.9	10.8	-4.2	5.5	9.1	3.3	10.6
CMLD010584	Standard rocaglate	COC(=O)[C@@H]1[C@@H](O)[C@@]2(O)C3=C(OC)C=C(F)C=C3O[C@]2([C@H]1C1=CC=CC=C1)C1=CC=C(Cl)C=C1	Racemic	12.8	30.2	20.2	6.2	21.5	12.3	13.2	9.9
CMLD011876	Standard rocaglate	COC(=O)[C@@H]1[C@@H](O)[C@@]2(O)C3=C(OC)C=C(OC)C=C3O[C@]2([C@H]1C1=CC=CC=C1)C1=CC=C(Br)C=C1	Absolute	25.8	23.1	19.1	6.8	24.5	1.9	13	8.7
CMLD010429	Standard rocaglate	COC(=O)[C@@H]1[C@@H](O)[C@@]2(O)C3=C(OC)C=C(OC)C=C3O[C@]2([C@H]1C1=CC=CC=C1)C1=CC=C(OC)C=C1	Racemic	20.8	19.7	9.6	4	20.3	0.8	6.8	4
CMLD010857	Standard rocaglate	COC(=O)[C@@H]1[C@@H](O)[C@@]2(O)C3=C(OC)C=C(OS(=O)(=O)C4=CC=C(C)C=C4)C=C3O[C@]2([C@H]1C1=CC=CC=C1)C1=CC=C(Br)C=C1	Racemic	2.7	7.3	3.4	3.1	5	3.3	3.3	0.2
CMLD011884	Standard rocaglate	COC(=O)[C@@H]1[C@@H](O)[C@@]2(O)C3=C(OC)C=C(OS(=O)(=O)C4=CC=C(C)C=C4)C=C3O[C@]2([C@H]1C1=CC=CC=C1)C1=CC=C(OC)C=C1	Racemic	-1.3	7.3	6.1	-5.5	3	6.1	0.3	8.2
CMLD012687	Aglain	COC(=O)[C@H]1[C@@H](C2=CC=CC=C2)[C@@]2(OC3=CC(OC)=CC(OC)=C3[C@@]1(O)C2=O)C1=CC=C(OC)C=C1	Racemic	2.6	6.4	5.3	4.1	4.5	2.7	4.7	0.8
CMLD011703	Aglain	COC(=O)[C@H]1[C@@H](C2=CC=CC=C2)C2(OC3=CC(OC)=CC(OC)=C3[C@@]1(O)C2=O)C1=CC=C(OC)C=C1	Racemic	1.3	4.7	7	-5.8	3	2.4	0.6	9.1
CMLD010870	Aza-rocaglate	COC(=O)[C@H]1[C@@H](O)[C@@]2(O)C3=C(C=C(OC)C=C3OC)N(C)[C@]2([C@@H]1C1=CC=CC=C1)C1=CC=C(Br)C=C1	Racemic	18.4	17.6	10.9	5.9	18	0.6	8.4	3.5
CMLD011295	Aza-rocaglate	COC(=O)[C@H]1[C@@H](O)[C@@]2(O)C3=C(C=C(OC)C=C3OC)N(CC=C)[C@]2([C@@H]1C1=CC=CC=C1)C1=CC=C(OC)C=C1	Racemic	4.5	0.5	1.2	-0.5	2.5	2.8	0.4	1.2
CMLD010865	Aza-rocaglate	COC(=O)[C@H]1[C@@H](O)[C@@]2(O)C3=C(C=CC=C3F)N(C)[C@]2([C@@H]1C1=CC=CC=C1)C1=CC=C(OC)C=C1	Racemic	5.1	2	11.8	-0.6	3.6	2.2	5.6	8.8
CMLD010869	Aza-rocaglate	COC(=O)[C@H]1[C@@H](O)[C@@]2(O)C3=C(C=CC=C3OC)N(C)[C@]2([C@@H]1C1=CC=CC=C1)C1=CC=C(Br)C=C1	Racemic	3.3	3.1	8.1	-4.7	3.2	0.1	1.7	9.1
CMLD010867	Aza-rocaglate	COC(=O)[C@H]1[C@@H](O)[C@@]2(O)C3=C(C=CC=C3OC)N(C)[C@]2([C@@H]1C1=CC=CC=C1)C1=CC=C(OC)C=C1	Racemic	-2.2	2.6	5.5	-4.4	0.2	3.4	0.6	7
BUCMD00002	Standard rocaglate	COC(=O)[C@H]1[C@@H](O)[C@@]2(O)C3=C(OC)C=C(O)C=C3O[C@]2([C@@H]1C1=CC=CC=C1)C1=CC=C(Br)C=C1	Racemic	18.4	-2.3	18	7.3	8.1	14.6	12.7	7.6
CMLD011882	Standard rocaglate	COC(=O)[C@H]1[C@@H](O)[C@@]2(O)C3=C(OC)C=C(OS(=O)(=O)C4=CC=C(C)C=C4)C=C3O[C@]2([C@@H]1C1=CC=CC=C1)C1=CC=C(Br)C=C1	Racemic	12.8	19.3	8.8	4.3	16.1	4.6	6.6	3.2
CMLD011887	Standard rocaglate	COC(=O)[C@H]1[C@@H](O)[C@@]2(O)C3=C(OC)C=C(OS(=O)(=O)C4=CC=C(C)C=C4)C=C3O[C@]2([C@@H]1C1=CC=CC=C1)C1=CC=C(OC)C=C1	Racemic	9.1	23	13.6	-4.8	16.1	9.8	4.4	13
CMLD012098	Amidino rocaglate (ADR)	COC(=O)[C@H]1[C@H](C2=CC=CC=C2)[C@@]2(OC3=CC(OC)=CC(OC)=C3[C@@]22OC(=N[C@@]12O)C1=CC=CC=C1)C1=CC=C(OC)C=C1	Racemic	7.9	-1.2	1.8	-1	3.4	6.4	0.4	2
CMLD013627	Rocaglate pyrimidinone (RP)	COC(=O)\C=C\N1C(=O)C2=C(N=C1C1=CC=CC=C1)[C@@]1(O)C3=C(OC)C=C(OC)C=C3O[C@]1([C@@H]2C1=CC=CC=C1)C1=CC=C(OC)C=C1	Racemic	15.8	5.2	11	8.8	10.5	7.5	9.9	1.6
CMLD013574	Rocaglate pyrimidinone (RP)	COC(=O)\C=C\OC1=NC(=NC2=C1[C@@H](C1=CC=CC=C1)[C@@]1(OC3=CC(OC)=CC(OC)=C3[C@]21O)C1=CC=C(OC)C=C1)C1=CC=CC=C1	Racemic	2.3	-7.5	2.9	0.4	-2.6	6.9	1.7	1.8
CMLD013587	Standard rocaglate	COC(=O)C1=C(C2=CC=CC=C2)[C@@]2(OC3=CC(OC)=CC(OC)=C3[C@]2(O)C1=O)C1=CC=C(OC)C=C1	Racemic	23.7	14.2	11.4	9.7	19	6.7	10.6	1.2
CMLD011853	Standard rocaglate	COC(=O)C1=C(OS(=O)(=O)C2=CC=C(C)C=C2)[C@@]2(O)C3=C(OC)C=C(OC)C=C3O[C@]2([C@@H]1C1=CC=CC=C1)C1=CC=C(OC)C=C1	Racemic	2.4	15.4	7.8	-0.8	8.9	9.2	3.5	6.1
CMLD013155	Rocaglate pyrimidinone (RP)	COC(=O)CCCN1C(=O)C2=C(N=C1C1=CC=CC=C1)[C@@]1(O)C3=C(OC)C=C(OC)C=C3O[C@]1([C@@H]2C1=CC=CC=C1)C1=CC=C(OC)C=C1	Racemic	27	24.6	18.1	11	25.8	1.7	14.6	5
CMLD013336	Rocaglate pyrimidinone (RP)	COC(=O)CCCN1C(=O)C2=C(N=C1C1=CC=CC=C1)[C@@]1(O)C3=C(OC)C=C(OC)C=C3O[C@]1([C@H]2C1=CC=CC=C1)C1=CC=C(OC)C=C1	Racemic	10.2	15.6	3.4	5.5	12.9	3.8	4.5	1.5
CMLD013603	C8b amino rocaglate	COC(CCCN[C@@]12C(=O)[C@@H]([C@@H](C3=CC=CC=C3)[C@@]1(OC1=CC(OC)=CC(OC)=C21)C1=CC=C(OC)C=C1)C(=O)OC)OC	Racemic	17	9.3	21.4	11.3	13.2	5.4	16.4	7.1
CMLD013571	Rocaglate pyrimidinone (RP)	COC(CN1C(=O)C2=C(N=C1C1=CC=CC=C1)[C@@]1(O)C3=C(OC)C=C(OC)C=C3O[C@]1([C@@H]2C1=CC=CC=C1)C1=CC=C(OC)C=C1)CC(O)=O	Racemic	16.8	0.8	16.4	3.4	8.8	11.3	9.9	9.2
CMLD010583	Standard rocaglate	COC1=C2C(O[C@]3([C@H]([C@H](C#N)[C@@H](O)[C@@]23O)C2=CC=CC=C2)C2=CC=C(Br)C=C2)=CC(F)=C1	Racemic	14.9	11.7	13.1	3.5	13.3	2.3	8.3	6.8
CMLD013347	Rocaglate pyrimidinone (RP)	COC1=CC(OC)=C2C(O[C@]3([C@@H](C4=C(N=C(NC4=O)C4=CC=CC=C4)[C@@]23O)C2=CC=CC=C2)C2=CC=C(Br)C=C2)=C1	Racemic	20.4	11.7	18.3	3.9	16.1	6.2	11.1	10.2
CMLD011872	Rocaglate ketone	COC1=CC=C(C=C1)[C@@]12OC3=CC(O)=CC(OC)=C3[C@]1(O)[C@H](O)[C@@H]([C@H]2C1=CC=CC=C1)C(=O)C1=CC=CO1	racemic	9.7	12.7	16.3	3.5	11.2	2.1	9.9	9.1
CMLD013345	Rocaglate pyrimidinone (RP)	COC1=CC=C(C=C1)[C@@]12OC3=CC(OC)=C(Cl)C(OC)=C3[C@]1(O)C1=C([C@H]2C2=CC=CC=C2)C(=O)N2CCCC2=N1	Racemic	18.9	24.6	18.8	13.2	21.8	4	16	4
CMLD012312	C8b amino rocaglate	COC1=CC=C(C=C1)[C@@]12OC3=CC(OC)=CC(OC)=C3[C@]1(NCC1=CC=CC=C1)C(=O)C[C@H]2C1=CC=CC=C1	Racemic	7.7	12.1	0.5	9.6	9.9	3.1	5.1	6.4
CMLD012049	Rocaglate ketone	COC1=CC=C(C=C1)[C@@]12OC3=CC(OC)=CC(OC)=C3[C@]1(O)[C@@H](O)[C@@H]([C@H]2C1=CC=CC=C1)C(=O)C1=CC=CO1	Absolute	30.3	24.4	20.1	16.9	27.4	4.2	18.5	2.3
CMLD012051	Rocaglaol	COC1=CC=C(C=C1)[C@@]12OC3=CC(OC)=CC(OC)=C3[C@]1(O)[C@@H](O)C[C@H]2C1=CC=CC=C1	Racemic	17.3	25.6	30.9	12.8	21.5	5.9	21.9	12.8
CMLD011844	Rocaglate ketone	COC1=CC=C(C=C1)[C@@]12OC3=CC(OC)=CC(OC)=C3[C@]1(O)[C@H](O)[C@@H]([C@H]2C1=CC=C(Br)C=C1)C(=O)C1=CC=CO1	Racemic	0.9	11.7	3.7	1.3	6.3	7.6	2.5	1.7
CMLD011871	Rocaglate ketone	COC1=CC=C(C=C1)[C@@]12OC3=CC(OC)=CC(OC)=C3[C@]1(O)[C@H](O)[C@@H]([C@H]2C1=CC=C(O)C=C1)C(=O)C1=CC=CO1	racemic	20.4	31	9.8	7	25.7	7.5	8.4	2
BUCMD00269	Rocaglate ketone	COC1=CC=C(C=C1)[C@@]12OC3=CC(OC)=CC(OC)=C3[C@]1(O)[C@H](O)[C@@H]([C@H]2C1=CC=C(OCCC2(CCC#C)N=N2)C=C1)C(=O)C1=CC=CO1	racemic	1	0.7	-5.6	-0.9	0.9	0.2	-3.3	3.3
CMLD012185	Rocaglate ketone	COC1=CC=C(C=C1)[C@@]12OC3=CC(OC)=CC(OC)=C3[C@]1(O)[C@H](O)[C@@H]([C@H]2C1=CC=CC(OC)=C1)C(=O)C1=CC=CO1	Racemic	30.7	21.5	14.4	17.6	26.1	6.5	16	2.3
CMLD012176	Rocaglate ketone	COC1=CC=C(C=C1)[C@@]12OC3=CC(OC)=CC(OC)=C3[C@]1(O)[C@H](O)[C@@H]([C@H]2C1=CC=CC=C1)C(=O)C1=C(C)C2=C(O1)C=CC=C2	Racemic	9.2	-4.7	6.8	2.8	2.3	9.8	4.8	2.8
CMLD012175	Rocaglate ketone	COC1=CC=C(C=C1)[C@@]12OC3=CC(OC)=CC(OC)=C3[C@]1(O)[C@H](O)[C@@H]([C@H]2C1=CC=CC=C1)C(=O)C1=C(OC)C=CC=C1	Racemic	17.7	3.4	9.8	5.8	10.6	10.1	7.8	2.8
CMLD012169	Rocaglate ketone	COC1=CC=C(C=C1)[C@@]12OC3=CC(OC)=CC(OC)=C3[C@]1(O)[C@H](O)[C@@H]([C@H]2C1=CC=CC=C1)C(=O)C1=CC(C)=C(C)O1	Racemic	19.2	11.5	13.1	11.5	15.4	5.4	12.3	1.1
CMLD012168	Rocaglate ketone	COC1=CC=C(C=C1)[C@@]12OC3=CC(OC)=CC(OC)=C3[C@]1(O)[C@H](O)[C@@H]([C@H]2C1=CC=CC=C1)C(=O)C1=CC=C(C)O1	Racemic	11.8	15.7	20.6	17.3	13.8	2.8	19	2.3
CMLD012174	Rocaglate ketone	COC1=CC=C(C=C1)[C@@]12OC3=CC(OC)=CC(OC)=C3[C@]1(O)[C@H](O)[C@@H]([C@H]2C1=CC=CC=C1)C(=O)C1=CC=CC=C1	Racemic	13.8	-0.2	5.1	5.3	6.8	9.9	5.2	0.1
CMLD008809	Rocaglate ketone	COC1=CC=C(C=C1)[C@@]12OC3=CC(OC)=CC(OC)=C3[C@]1(O)[C@H](O)[C@@H]([C@H]2C1=CC=CC=C1)C(=O)C1=CC=CO1	Racemic	24.8	34	16.1	6.8	29.4	6.5	11.5	6.6
CMLD012167	Rocaglate ketone	COC1=CC=C(C=C1)[C@@]12OC3=CC(OC)=CC(OC)=C3[C@]1(O)[C@H](O)[C@@H]([C@H]2C1=CC=CC=C1)C(=O)C1=CC2=C(C=CC=C2)N1C	Racemic	12.5	6.5	5.9	8.6	9.5	4.2	7.3	1.9
CMLD012177	Rocaglate ketone	COC1=CC=C(C=C1)[C@@]12OC3=CC(OC)=CC(OC)=C3[C@]1(O)[C@H](O)[C@@H]([C@H]2C1=CC=CC=C1)C(=O)C1=CC2=C(O1)C(OC)=CC=C2	Racemic	11.1	0.3	3.6	5.3	5.7	7.6	4.5	1.2
CMLD012709	Standard rocaglate	COC1=CC=C(C=C1)[C@@]12OC3=CC(OC)=CC(OC)=C3[C@]1(O)[C@H](O)[C@@H]([C@H]2C1=CC=CC=C1)C(=O)NOCC1=CC=CC=C1	Absolute	3.7	10.4	4.7	5.6	7.1	4.7	5.2	0.6
CMLD012106	Rocaglate ketone	COC1=CC=C(C=C1)[C@@]12OC3=CC(OC)=CC(OC)=C3[C@]1(O)[C@H](OC(=O)CCC#C)[C@@H]([C@H]2C1=CC=CC=C1)C(=O)C1=CC=CO1	Racemic	16.5	2.8	5.6	6.7	9.7	9.7	6.2	0.8
CMLD012048	Rocaglate pyrimidinone (RP)	COC1=CC=C(C=C1)[C@@]12OC3=CC(OC)=CC(OC)=C3[C@]1(O)C1=C([C@@H]2C2=CC=CC=C2)C(=O)NC(=N1)C1=CC=CC=C1	Racemic	15.5	10.3	8.2	3.1	12.9	3.7	5.7	3.6
BUCMD00508	Rocaglate pyrimidinone (RP)	COC1=CC=C(C=C1)[C@@]12OC3=CC(OC)=CC(OC)=C3[C@]1(O)C1=C([C@H]2C2=CC=CC=C2)C(=O)N(C\C=C\C(=O)NCC#C)C(=N1)C1=CC=CC=C1	Racemic	23.4	23.7	7.7	4.6	23.6	0.2	6.2	2.2
CMLD013212	Rocaglate pyrimidinone (RP)	COC1=CC=C(C=C1)[C@@]12OC3=CC(OC)=CC(OC)=C3[C@]1(O)C1=C([C@H]2C2=CC=CC=C2)C(=O)N(C\C=C\C(=O)OCCCC#C)C(=N1)C1=CC=CC=C1	Racemic	7.6	17.5	6.6	5.2	12.6	7	5.9	1
CMLD013569	Rocaglate pyrimidinone (RP)	COC1=CC=C(C=C1)[C@@]12OC3=CC(OC)=CC(OC)=C3[C@]1(O)C1=C([C@H]2C2=CC=CC=C2)C(=O)N(CC#C)C(=N1)C1=CC=C(OCC#C)C=C1	Racemic	7.1	-11	5.2	2	-2	12.8	3.6	2.3
CMLD013572	Rocaglate pyrimidinone (RP)	COC1=CC=C(C=C1)[C@@]12OC3=CC(OC)=CC(OC)=C3[C@]1(O)C1=C([C@H]2C2=CC=CC=C2)C(=O)N(CC=C)C(=N1)C1=CC=CC=C1	Racemic	21.9	22.4	15.2	3.1	22.2	0.4	9.2	8.6
CMLD013156	Rocaglate pyrimidinone (RP)	COC1=CC=C(C=C1)[C@@]12OC3=CC(OC)=CC(OC)=C3[C@]1(O)C1=C([C@H]2C2=CC=CC=C2)C(=O)N(CCCC(=O)NCC#C)C(=N1)C1=CC=CC=C1	Racemic	18.8	26	9.6	7	22.4	5.1	8.3	1.8
BUCMD00498	Rocaglate pyrimidinone (RP)	COC1=CC=C(C=C1)[C@@]12OC3=CC(OC)=CC(OC)=C3[C@]1(O)C1=C([C@H]2C2=CC=CC=C2)C(=O)N(CCCC(=O)NCCC2(CCC#C)N=N2)C(=N1)C1=CC=CC=C1	Racemic	7.4	4.9	4.7	4	6.2	1.8	4.4	0.5
CMLD013335	Rocaglate pyrimidinone (RP)	COC1=CC=C(C=C1)[C@@]12OC3=CC(OC)=CC(OC)=C3[C@]1(O)C1=C([C@H]2C2=CC=CC=C2)C(=O)N(CCCC(=O)NCCOCCOCC#C)C(=N1)C1=CC=CC=C1	Racemic	17.9	24.1	16.3	17.6	21	4.4	17	0.9
CMLD012101	Rocaglate pyrimidinone (RP)	COC1=CC=C(C=C1)[C@@]12OC3=CC(OC)=CC(OC)=C3[C@]1(O)C1=C([C@H]2C2=CC=CC=C2)C(=O)NC(=N1)C1=CC=C(Br)C=C1	Racemic	5.7	-2	0.8	3.5	1.9	5.4	2.2	1.9
CMLD012043	Rocaglate pyrimidinone (RP)	COC1=CC=C(C=C1)[C@@]12OC3=CC(OC)=CC(OC)=C3[C@]1(O)C1=C([C@H]2C2=CC=CC=C2)C(=O)NC(=N1)C1=CC=C(C)C=C1	Racemic	7.7	-0.3	4.6	5.4	3.7	5.7	5	0.6
CMLD012330	Rocaglate pyrimidinone (RP)	COC1=CC=C(C=C1)[C@@]12OC3=CC(OC)=CC(OC)=C3[C@]1(O)C1=C([C@H]2C2=CC=CC=C2)C(=O)NC(=N1)C1=CC=C(C=C1)C(F)(F)F	Racemic	7.3	-2.2	-1.8	7.3	2.6	6.7	2.8	6.4
BUCMD00635	Rocaglate pyrimidinone (RP)	COC1=CC=C(C=C1)[C@@]12OC3=CC(OC)=CC(OC)=C3[C@]1(O)C1=C([C@H]2C2=CC=CC=C2)C(=O)NC(=N1)C1=CC=C(C=C1)N(C)C	Racemic	12	5.1	1.9	12.2	8.6	4.9	7.1	7.3
CMLD012146	Rocaglate pyrimidinone (RP)	COC1=CC=C(C=C1)[C@@]12OC3=CC(OC)=CC(OC)=C3[C@]1(O)C1=C([C@H]2C2=CC=CC=C2)C(=O)NC(=N1)C1=CC=C(Cl)C=C1	Racemic	9.3	4	4.9	8.5	6.7	3.7	6.7	2.5
CMLD012147	Rocaglate pyrimidinone (RP)	COC1=CC=C(C=C1)[C@@]12OC3=CC(OC)=CC(OC)=C3[C@]1(O)C1=C([C@H]2C2=CC=CC=C2)C(=O)NC(=N1)C1=CC=C(Cl)N=C1	Racemic	38.5	17.5	19.3	24.4	28	14.8	21.9	3.6
CMLD011832	Rocaglate pyrimidinone (RP)	COC1=CC=C(C=C1)[C@@]12OC3=CC(OC)=CC(OC)=C3[C@]1(O)C1=C([C@H]2C2=CC=CC=C2)C(=O)NC(=N1)C1=CC=C(F)C=C1	Racemic	5.4	21.2	10.7	5.1	13.3	11.2	7.9	4
CMLD012329	Rocaglate pyrimidinone (RP)	COC1=CC=C(C=C1)[C@@]12OC3=CC(OC)=CC(OC)=C3[C@]1(O)C1=C([C@H]2C2=CC=CC=C2)C(=O)NC(=N1)C1=CC=C(OCC2=CC=CC=C2)C=C1	Racemic	9	1.9	0.7	3.4	5.5	5	2.1	1.9
CMLD012319	Rocaglate pyrimidinone (RP)	COC1=CC=C(C=C1)[C@@]12OC3=CC(OC)=CC(OC)=C3[C@]1(O)C1=C([C@H]2C2=CC=CC=C2)C(=O)NC(=N1)C1=CC=CC(C)=C1	Racemic	25.7	9.9	10.1	12.3	17.8	11.2	11.2	1.6
CMLD012044	Rocaglate pyrimidinone (RP)	COC1=CC=C(C=C1)[C@@]12OC3=CC(OC)=CC(OC)=C3[C@]1(O)C1=C([C@H]2C2=CC=CC=C2)C(=O)NC(=N1)C1=CC=CC(OC)=C1	Racemic	23	13.9	9.8	8.8	18.5	6.4	9.3	0.7
CMLD012598	Rocaglate pyrimidinone (RP)	COC1=CC=C(C=C1)[C@@]12OC3=CC(OC)=CC(OC)=C3[C@]1(O)C1=C([C@H]2C2=CC=CC=C2)C(=O)NC(=N1)C1=CC=CC(OCC2=CC=CC=C2)=C1	Racemic	4	18.2	4.7	-1.6	11.1	10	1.6	4.5
CMLD012041	Rocaglate pyrimidinone (RP)	COC1=CC=C(C=C1)[C@@]12OC3=CC(OC)=CC(OC)=C3[C@]1(O)C1=C([C@H]2C2=CC=CC=C2)C(=O)NC(=N1)C1=CC=NC=C1	Racemic	31.4	16.4	17.4	18.5	23.9	10.6	18	0.8
CMLD012100	Rocaglate pyrimidinone (RP)	COC1=CC=C(C=C1)[C@@]12OC3=CC(OC)=CC(OC)=C3[C@]1(O)C1=C([C@H]2C2=CC=CC=C2)C(=O)NC(=N1)C1=NC=CC=C1	Racemic	10.8	5.9	8.2	12.1	8.4	3.5	10.2	2.8
CMLD013575	Rocaglate pyrimidinone (RP)	COC1=CC=C(C=C1)[C@@]12OC3=CC(OC)=CC(OC)=C3[C@]1(O)C1=C([C@H]2C2=CC=CC=C2)C(OC)=NC(=N1)C1=CC=CC=C1	Racemic	6	-7.1	6.8	4.8	-0.6	9.3	5.8	1.4
CMLD013570	Rocaglate pyrimidinone (RP)	COC1=CC=C(C=C1)[C@@]12OC3=CC(OC)=CC(OC)=C3[C@]1(O)C1=C([C@H]2C2=CC=CC=C2)C(OCC#C)=NC(=N1)C1=CC=C(OCC#C)C=C1	Racemic	2.1	-15	4.2	-0.1	-6.5	12.1	2.1	3
CMLD013576	Rocaglate pyrimidinone (RP)	COC1=CC=C(C=C1)[C@@]12OC3=CC(OC)=CC(OC)=C3[C@]1(O)C1=C([C@H]2C2=CC=CC=C2)C(OCC=C)=NC(=N1)C1=CC=CC=C1	Racemic	4.1	-2.8	2.9	5.2	0.7	4.9	4.1	1.6
CMLD013584	Rocaglate pyrimidinone (RP)	COC1=CC=C(C=C1)[C@@]12OC3=CC(OC)=CC(OC)=C3[C@]1(O)C1=C(\C2=C/CC2=CC=CC=C2)C(=O)NC(=N1)C1=CC=CC=C1	Racemic	3.7	-11.2	2.8	2.7	-3.8	10.5	2.8	0.1
CMLD009401	Standard rocaglate	COC1=CC=C(C=C1)[C@@]12OC3=CC(OC)=CC(OC)=C3[C@]1(O)C1=NNC(=O)C1=C2C1=CC=CC=C1	Racemic	10.5	9.6	2.5	-2.8	10.1	0.6	-0.2	3.7
CMLD012370	Rocaglate pyrimidinone (RP)	COC1=CC=C(C=C1)[C@@]12OC3=CC(OC)=CC(OC)=C3[C@]1(OC)C1=C([C@H]2C2=CC=CC=C2)C(=O)N(C)C(=N1)C1=CC=CC=C1	Racemic	-1.1	-13	2.7	0.5	-7.1	8.4	1.6	1.6
CMLD013568	Rocaglate pyrimidinone (RP)	COC1=CC=C(C=C1)[C@@]12OC3=CC(OC)=CC(OC)=C3[C@]1(OC)C1=C([C@H]2C2=CC=CC=C2)C(OC)=NC(=N1)C1=CC=CC=C1	Racemic	4.7	-13.4	-2.2	3.4	-4.4	12.8	0.6	4
CMLD012596	Rocaglate pyrimidinone (RP)	COC1=CC=C(C=C1)[C@@]12OC3=CC(OC)=CC(OC)=C3[C@]1(OCC#C)C1=C([C@H]2C2=CC=CC=C2)C(OCC#C)=NC(=N1)C1=CC=CC=C1	Racemic	10	17.5	11.7	11.5	13.8	5.3	11.6	0.1
CMLD013341	Rocaglate pyrimidinone (RP)	COC1=CC=C(C=C1)[C@@]12OC3=CC(OCC#C)=CC(OC)=C3[C@]1(O)C1=C([C@H]2C2=CC=CC=C2)C(=O)NC(=N1)C1=CC=CC=C1	Racemic	-1	7.9	2.6	0.3	3.5	6.3	1.5	1.6
CMLD013578	Rocaglate pyrimidinone (RP)	COC1=CC=C(C=C1)[C@@]12OC3=CC(OCC(=O)NCC#C)=CC(OC)=C3[C@]1(O)C1=C([C@H]2C2=CC=CC=C2)C(=O)NC(=N1)C1=CC=CC=C1	Racemic	14.1	-2.8	9.4	8.8	5.7	12	9.1	0.4
BUCMD00268	Rocaglate ketone	COC1=CC=C(C=C1)[C@@]12OC3=CC(OCCC4(CCC#C)N=N4)=CC(OC)=C3[C@]1(O)[C@H](O)[C@@H]([C@H]2C1=CC=CC=C1)C(=O)C1=CC=CO1	Racemic	2.2	1.4	-4.1	-2.1	1.8	0.6	-3.1	1.4
CMLD013573	Rocaglate pyrimidinone (RP)	COC1=CC=C(C=C1)[C@@]12OC3=CC(OS(=O)(=O)C4=CC=C(C)C=C4)=CC(OC)=C3[C@]1(O)C1=C([C@H]2C2=CC=CC=C2)C(=O)N(CC2=CC=CC=C2)C(=N1)C1=CC=CC=C1	Racemic	3.8	-12.2	1.5	0.8	-4.2	11.3	1.2	0.5
CMLD010866	Aza-rocaglate	COC1=CC=C(C=C1)[C@]12[C@@H](C[C@@H](O)[C@@]1(O)C1=C(C=CC=C1F)N2C)C1=CC=CC=C1	Racemic	5.6	1.7	12.8	-0.8	3.7	2.8	6	9.6
CMLD010868	Aza-rocaglate	COC1=CC=C(C=C1)[C@]12[C@@H](C[C@@H](O)[C@@]1(O)C1=C(C=CC=C1OC)N2C)C1=CC=CC=C1	Racemic	4.7	2.3	3.2	-5.8	3.5	1.7	-1.3	6.4
CMLD012728	Aza-rocaglate	COC1=CC=C(C=C1)[C@]12[C@H](C[C@@H](O)[C@@]1(O)C1=C(F)C=CC=C1N2C)C1=CC=CC=C1	Racemic	6.8	13.8	2.1	9	10.3	4.9	5.6	4.9
CMLD010585	Rocaglaol	COC1=CC=C(C=C1)[C@]12OC3=CC(OC)=CC(OC)=C3[C@@]1(O)[C@@H](O)C[C@@H]2C1=CC=CC=C1	Absolute	2.7	0.8	7.8	-1.8	1.8	1.3	3	6.8
CMLD012368	Rocaglate pyrimidinone (RP)	COC1=CC=C(C=C1)[C@]12OC3=CC(OC)=CC(OC)=C3[C@@]1(O)C1=C([C@@H]2C2=CC=CC=C2)C(=O)NC(=N1)C1=CC=CC(OC)=C1	Absolute	23.9	11.6	10.7	15	17.8	8.7	12.9	3
CMLD013164	Standard rocaglate	COC1=CC=C(C=C1)[C@H]1[C@@H]([C@@H](O)[C@@]2(O)C3=C(OC)C=C(OC)C=C3O[C@@]12C1=CC=C(OC)C=C1)C(=O)N(C)C	Absolute	1.6	7	-1.6	2.1	4.3	3.8	0.3	2.6
CMLD011833	Rocaglate pyrimidinone (RP)	COC1=CC=C(C=C1)C1=NC2=C([C@@H](C3=CC=CC=C3)[C@@]3(OC4=CC(OC)=CC(OC)=C4[C@]23O)C2=CC=C(OC)C=C2)C(=O)N1	Racemic	2.6	14.6	3.2	-3.2	8.6	8.5	0	4.5
CMLD012364	Rocaglate pyrimidinone (RP)	COC1=CC=C(C=C1)C1=NC2=C([C@@H](C3=CC=CC=C3)[C@@]3(OC4=CC(OC)=CC(OC)=C4[C@]23O)C2=CC=C(OC)C=C2)C(=O)N1	Absolute	31.7	18.6	19.1	29.9	25.2	9.3	24.5	7.6
CMLD008820	Aglain	COc1ccc(cc1)[C@@]12Oc3cc(OC)cc(OC)c3[C@@](O)([C@@H]1O)[C@@H]([C@H]2c1ccccc1)C(=O)OCc1ccccc1	Racemic	0.2	2.5	12	-8.9	1.4	1.6	1.6	14.8
CMLD008834	Aglain	COc1ccc(cc1)[C@]12Oc3cc(OC)cc(OC)c3[C@](O)([C@@H]([C@H]1c1ccccc1)c1ccccc1)C2=O	Racemic	4.7	11.2	13.4	-0.8	8	4.6	6.3	10
CMLD012604	C8b amino rocaglate	COCCN[C@@]12[C@@H](O)C[C@@H](C3=CC=CC=C3)[C@@]1(OC1=CC(OC)=CC(OC)=C21)C1=CC=C(OC)C=C1	Racemic	5.5	6	2.7	5.9	5.8	0.4	4.3	2.3
CMLD012603	C8b amino rocaglate	COCCN[C@@]12[C@H](O)[C@@H]([C@@H](C3=CC=CC=C3)[C@@]1(OC1=CC(OC)=CC(OC)=C21)C1=CC=C(OC)C=C1)C(=O)N(C)C	Racemic	4.6	10	-0.1	7.9	7.3	3.8	3.9	5.7
CMLD013590	C8b amino rocaglate	COCCN[C@@]12\C(C[C@@H](C3=CC=CC=C3)[C@@]1(OC1=CC(OC)=CC(OC)=C21)C1=CC=C(OC)C=C1)=N\O	Racemic	1.4	-4.6	3.5	4.6	-1.6	4.2	4.1	0.8
CMLD013592	C8b amino rocaglate	COCCN[C@@]12C(=O)[C@@H]([C@@H](C3=CC=CC=C3)[C@@]1(OC1=CC(OC)=CC(OC)=C21)C1=CC=C(OC)C=C1)C(=O)N(C)C	Racemic	2.3	-12.9	-0.4	1.9	-5.3	10.7	0.8	1.6
CMLD013605	C8b amino rocaglate	COCCN[C@@]12C(=O)C[C@@H](C3=CC=CC=C3)[C@@]1(OC1=CC(OC)=CC(OC)=C21)C1=CC=C(OC)C=C1	Racemic	2.1	-13.3	2.5	-1	-5.6	10.9	0.8	2.5
CMLD012981	Rocaglate pyrimidinone (RP)	COCCN[C@@]12C3=C([C@@H](C4=CC=CC=C4)[C@@]1(OC1=CC(OC)=CC(OC)=C21)C1=CC=C(OC)C=C1)C(=O)NC(=N3)C1=CC=CC=C1	Racemic	2.5	10.6	-2	5.9	6.6	5.7	2	5.6
BUCMD00258	Standard rocaglate	COCCOCOC(=C(F)F)C1=CC=C(C=C1)[C@@H]1[C@H]([C@@H](O)[C@@]2(O)C3=C(OC)C=C(OC)C=C3O[C@@]12C1=CC=C(OC)C=C1)C(=O)N(C)OC	Racemic	-3.8	-13.8	-1.7	-4.1	-8.8	7.1	-2.9	1.7
CMLD011879	Standard rocaglate	CON(C)C(=O)[C@H]1[C@@H](O)[C@@]2(O)C3=C(OC)C=C(O)C=C3O[C@]2([C@@H]1C1=CC=CC=C1)C1=CC=C(OC)C=C1	Racemic	3.4	12	12.6	-0.3	7.7	6.1	6.2	9.1
BUCMD00270	Standard rocaglate	CON(C)C(=O)[C@H]1[C@@H](O)[C@@]2(O)C3=C(OC)C=C(OC)C=C3O[C@]2([C@@H]1C1=CC=C(OCCC2(CCC#C)N=N2)C=C1)C1=CC=C(OC)C=C1	Racemic	2.4	1.7	-8.8	3.4	2.1	0.5	-2.7	8.6
CMLD011610	Standard rocaglate	CON(C)C(=O)[C@H]1[C@@H](O)[C@@]2(O)C3=C(OC)C=C(OC)C=C3O[C@]2([C@@H]1C1=CC=CC=C1)C1=CC=C(OC)C=C1	Racemic	7.4	16.1	14.9	1.9	11.8	6.2	8.4	9.2
CMLD011829	Aglain	CON(C)C(=O)[C@H]1[C@H](C2=CC=CC=C2)[C@]2(OC3=C(C(OC)=CC(OC)=C3)[C@]1(O)[C@H]2O)C1=CC=C(OC)C=C1	Absolute	5.2	11.4	0.1	-1.3	8.3	4.4	-0.6	1
CMLD011877	Standard rocaglate	CONC(=O)[C@@H]1[C@@H](O)[C@@]2(O)C3=C(OC)C=C(OC)C=C3O[C@]2([C@H]1C1=CC=CC=C1)C1=CC=C(Br)C=C1	Racemic	7.2	27.5	15	9.1	17.4	14.4	12.1	4.2
CMLD011880	Standard rocaglate	CONC(=O)[C@H]1[C@@H](O)[C@@]2(O)C3=C(OC)C=C(OC)C=C3O[C@]2([C@@H]1C1=CC=CC=C1)C1=CC=C(Br)C=C1	Racemic	14.7	30	20.4	2.4	22.4	10.8	11.4	12.7
CMLD011453	Rocaglaol	O[C@@]12C(=O)C[C@@H](C3=CC=CC=C3)[C@@]1(OC1=CC(F)=CC(F)=C21)C1=CC=C(Br)C=C1	Racemic	5.3	13.7	11.7	-1	9.5	5.9	5.4	9
BUCMD00601	Rocaglate pyrimidinone (RP)	COC1=CC=C(C=C1)[C@@]12OC3=CC(O)=CC(OC)=C3[C@]1(O)C1=C([C@H]2C2=CC=CC=C2)C(=O)N2CCCC2=N1	Racemic	31.9	40.7	31.5	28.1	36.3	6.2	29.8	2.4
BUCMD00602	Rocaglate pyrimidinone (RP)	COC1=CC=C(C=C1)[C@@]12OC3=CC(OCC#C)=CC(OC)=C3[C@]1(O)C1=C([C@H]2C2=CC=CC=C2)C(=O)N2CCCC2=N1	Racemic	33.6	20.4	12.2	10.5	27	9.3	11.4	1.2
